# Supplementary material for: First Synthesis of 3-Glycopyranosyl-1,2,4-Triazines and Some Cycloadditions Thereof
Source: MDPI journal article supplement (doi:10.3390/molecules27227801), 2022-11-12

# SUPPORTING INFORMATION

## First synthesis of 3-glycopyranosyl-1,2,4-triazines and some cycloadditions thereof

Éva Bokor,<sup>\*</sup> Attila Ferenczi, Mahir Hashimov, Éva Juhász-Tóth, Zsófia Götz,  
Alshimaa Ibrahim Zaki, László Somsák<sup>\*</sup>

*University of Debrecen, Department of Organic Chemistry, Debrecen, Hungary*

Copies of NMR spectra of the synthesized compounds.

---

<sup>\*</sup> Corresponding authors: É. Bokor - [bokor.eva@science.unideb.hu](mailto:bokor.eva@science.unideb.hu) ;  
L. Somsák - [somsak.laszlo@science.unideb.hu](mailto:somsak.laszlo@science.unideb.hu)

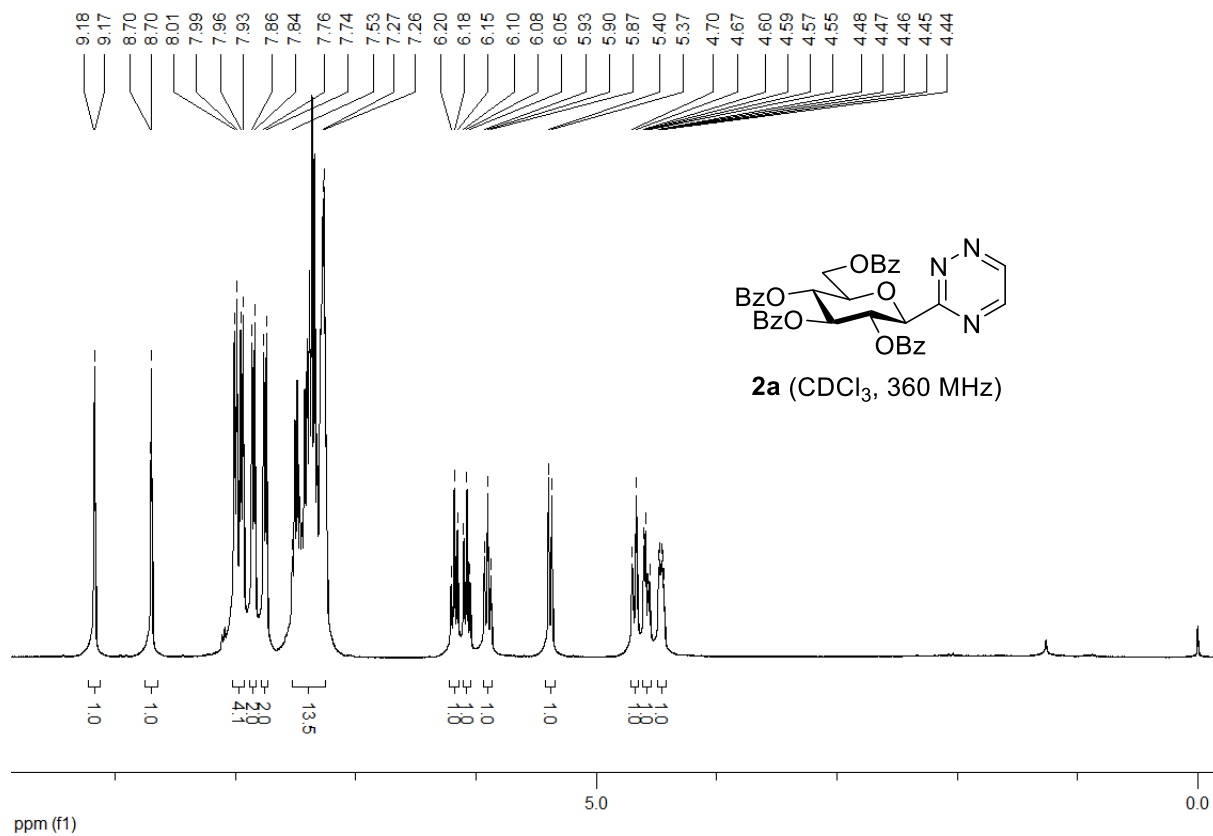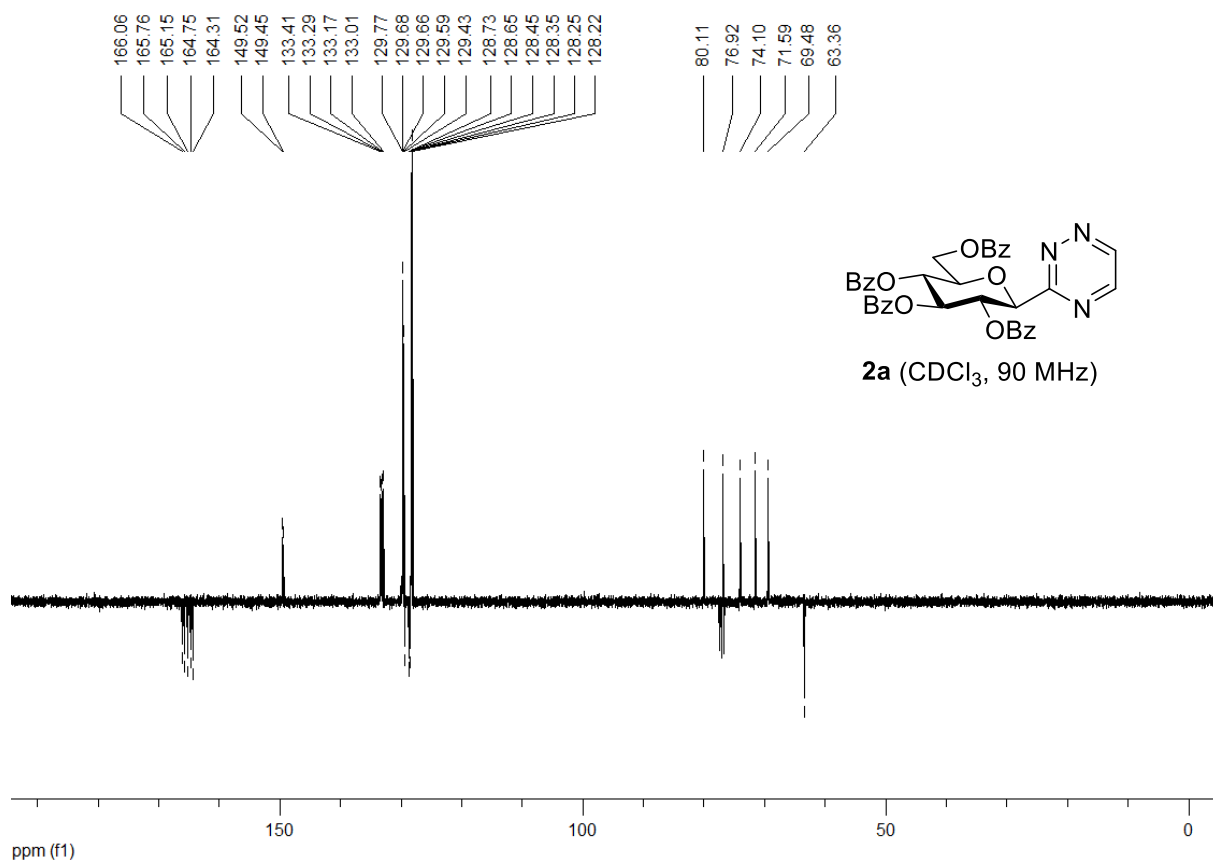

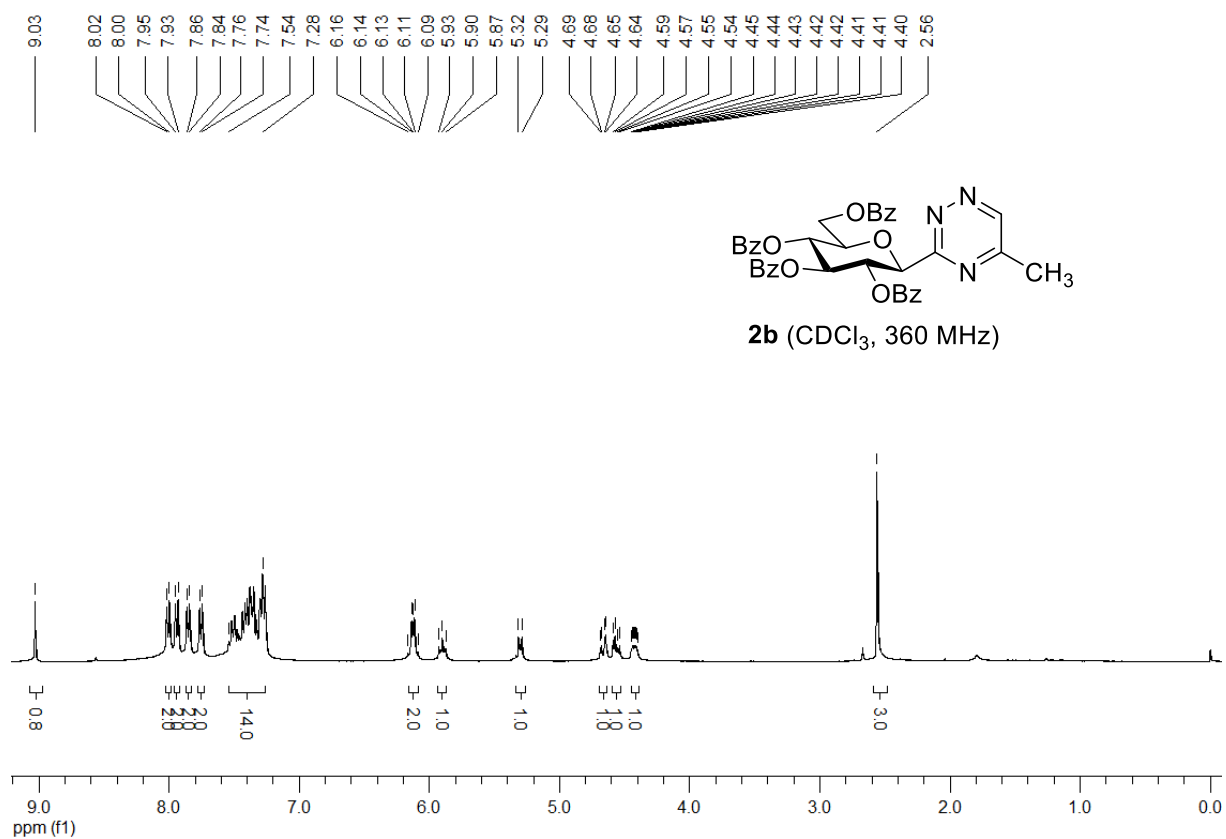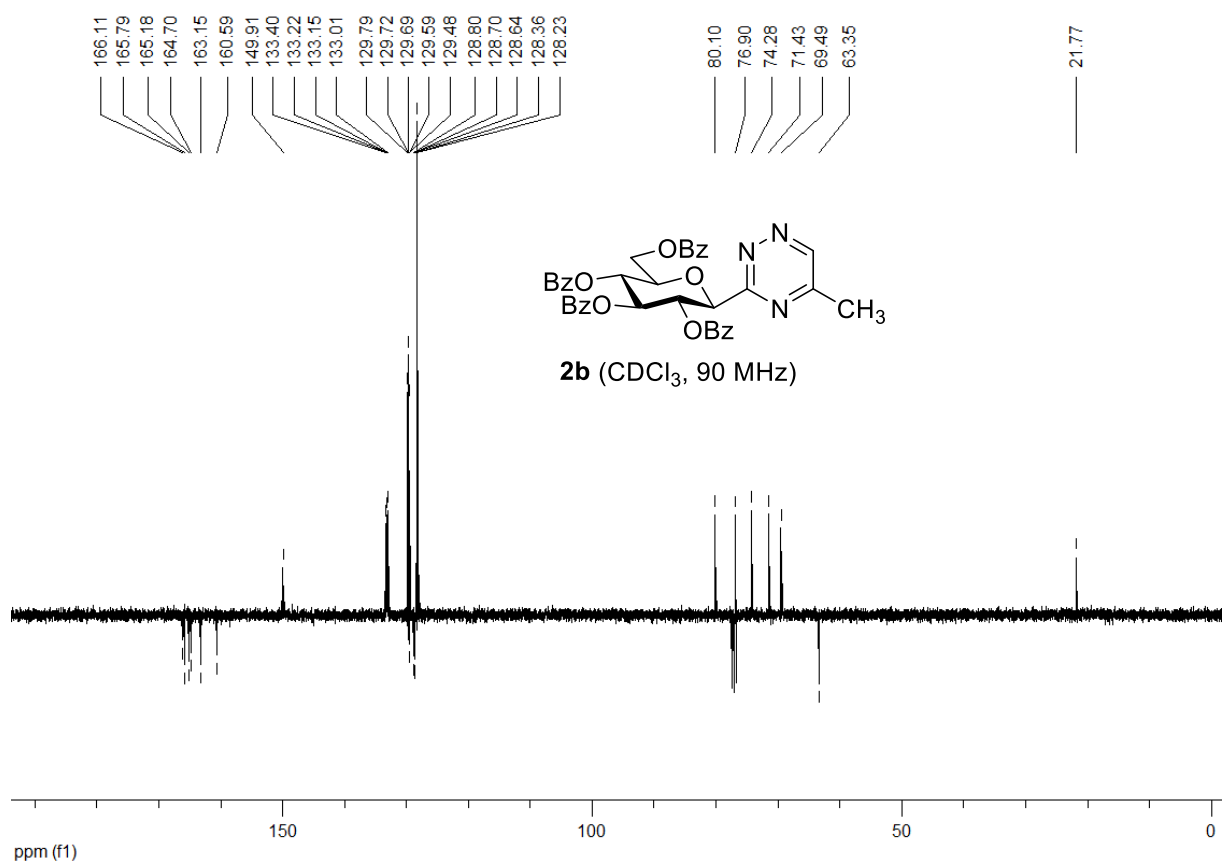

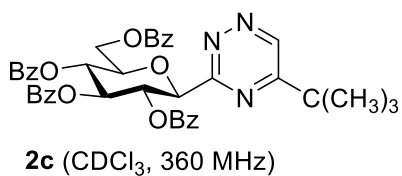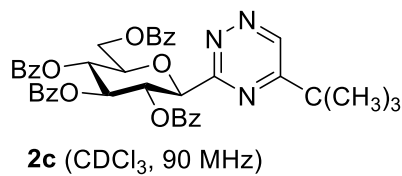

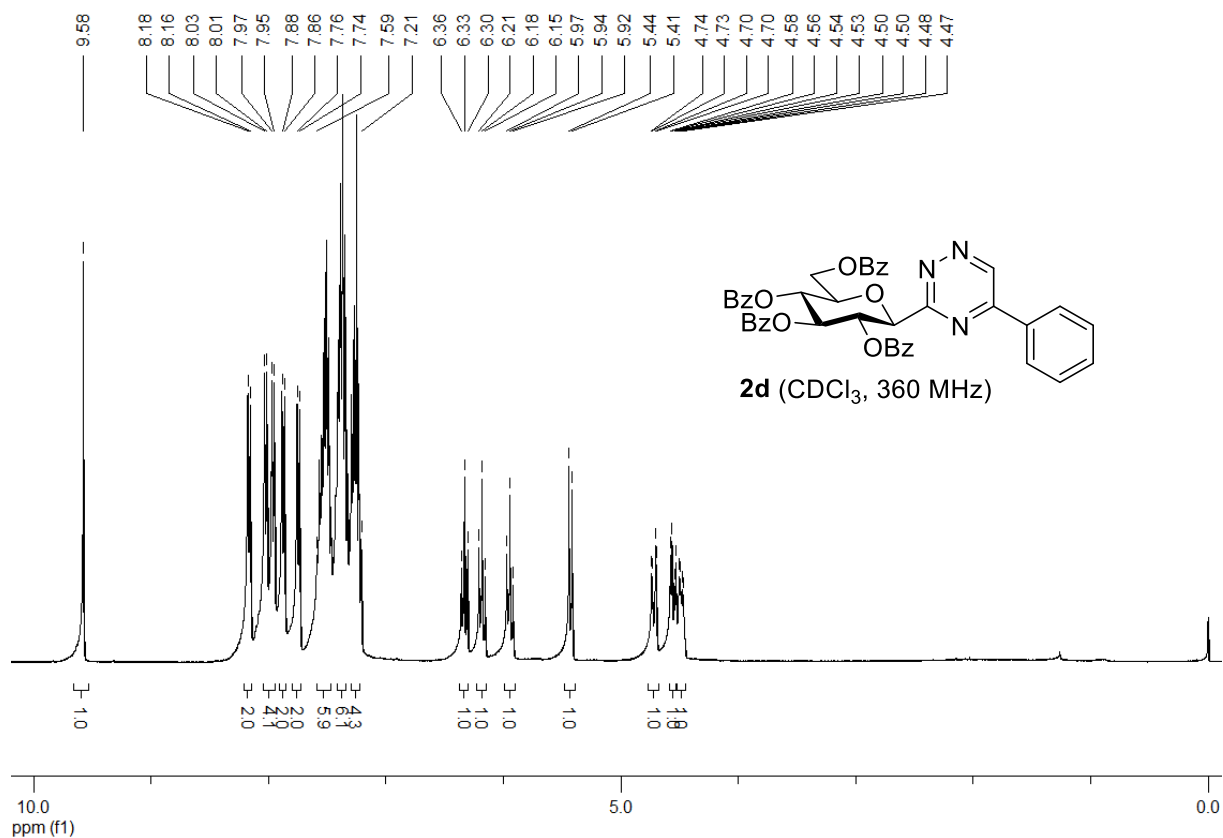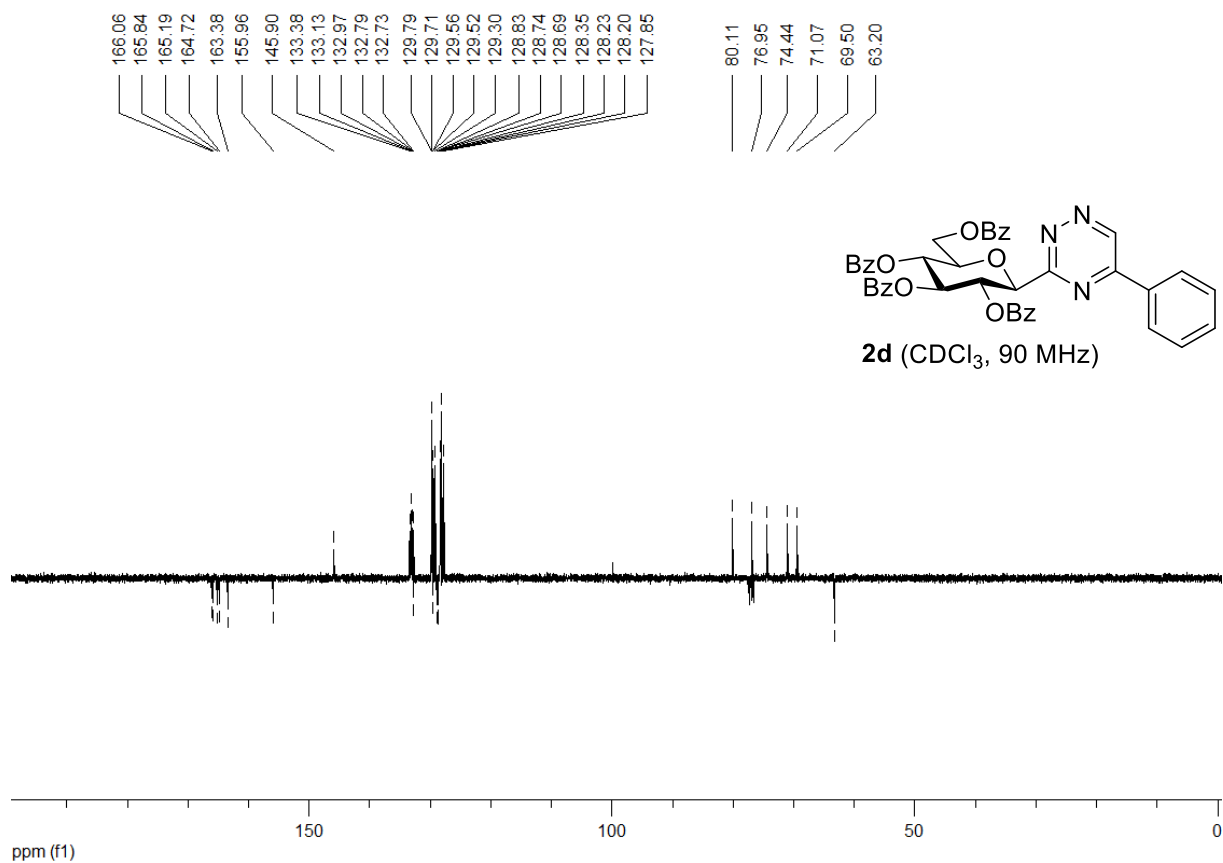



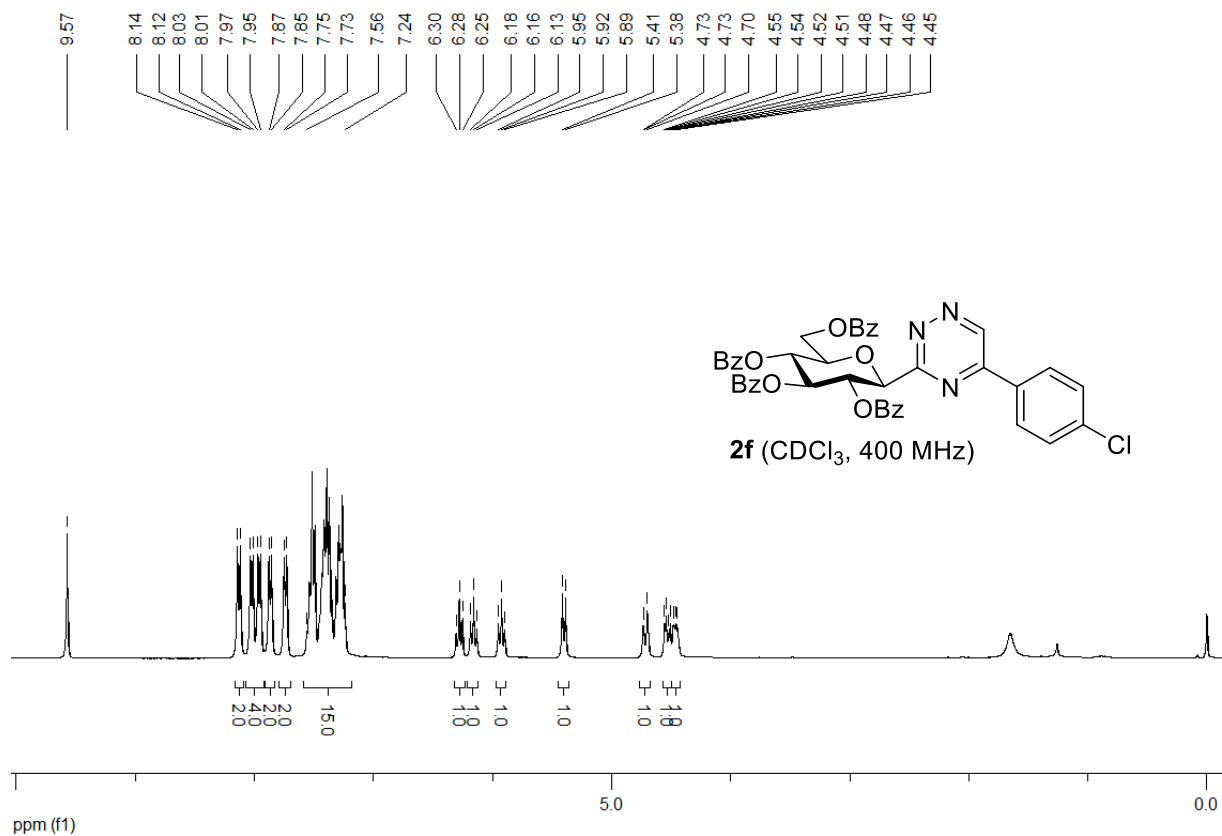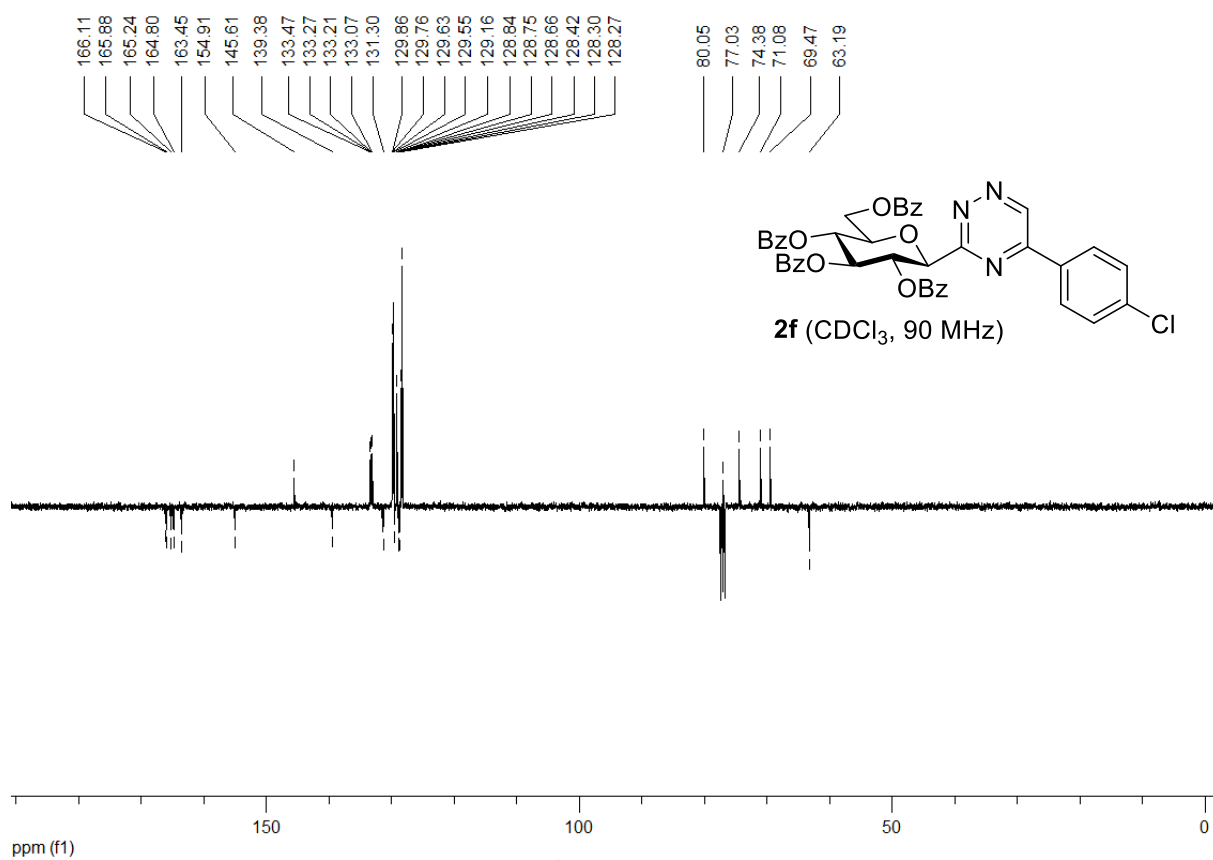

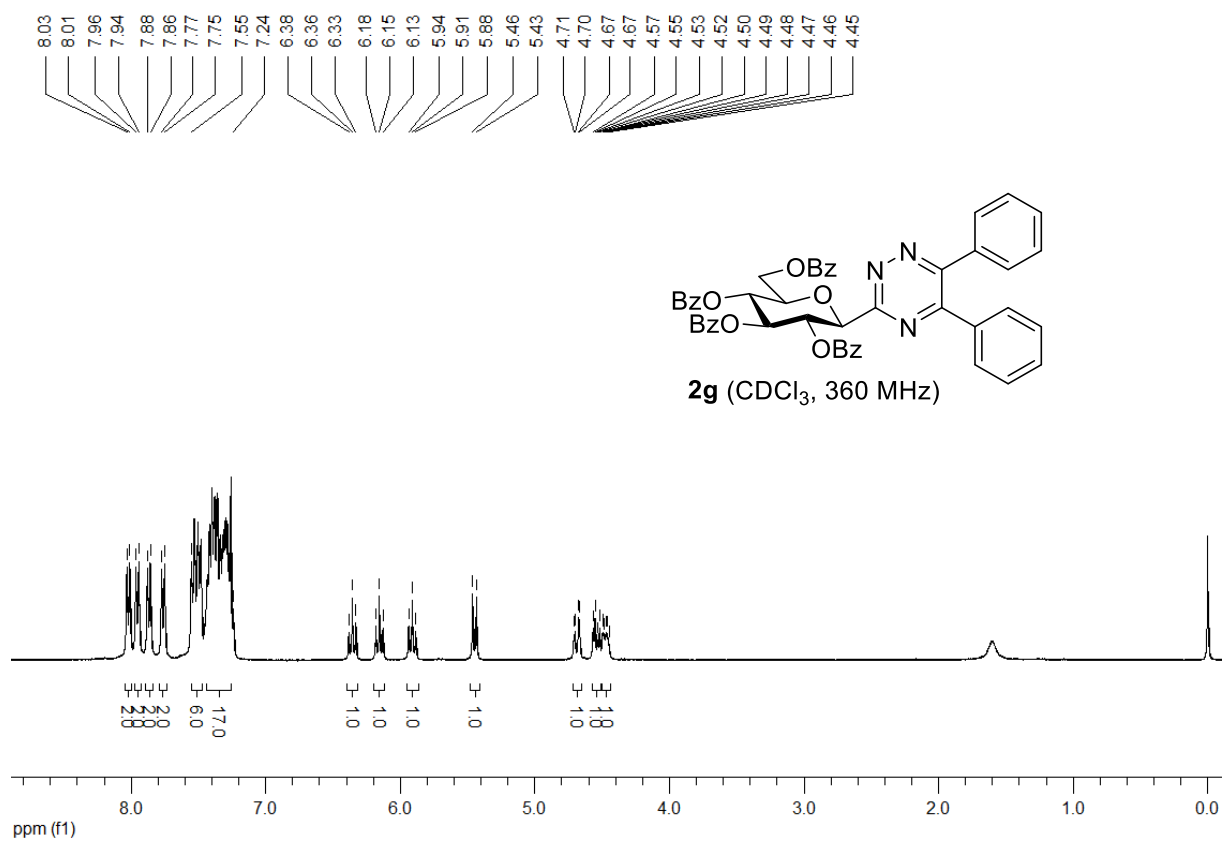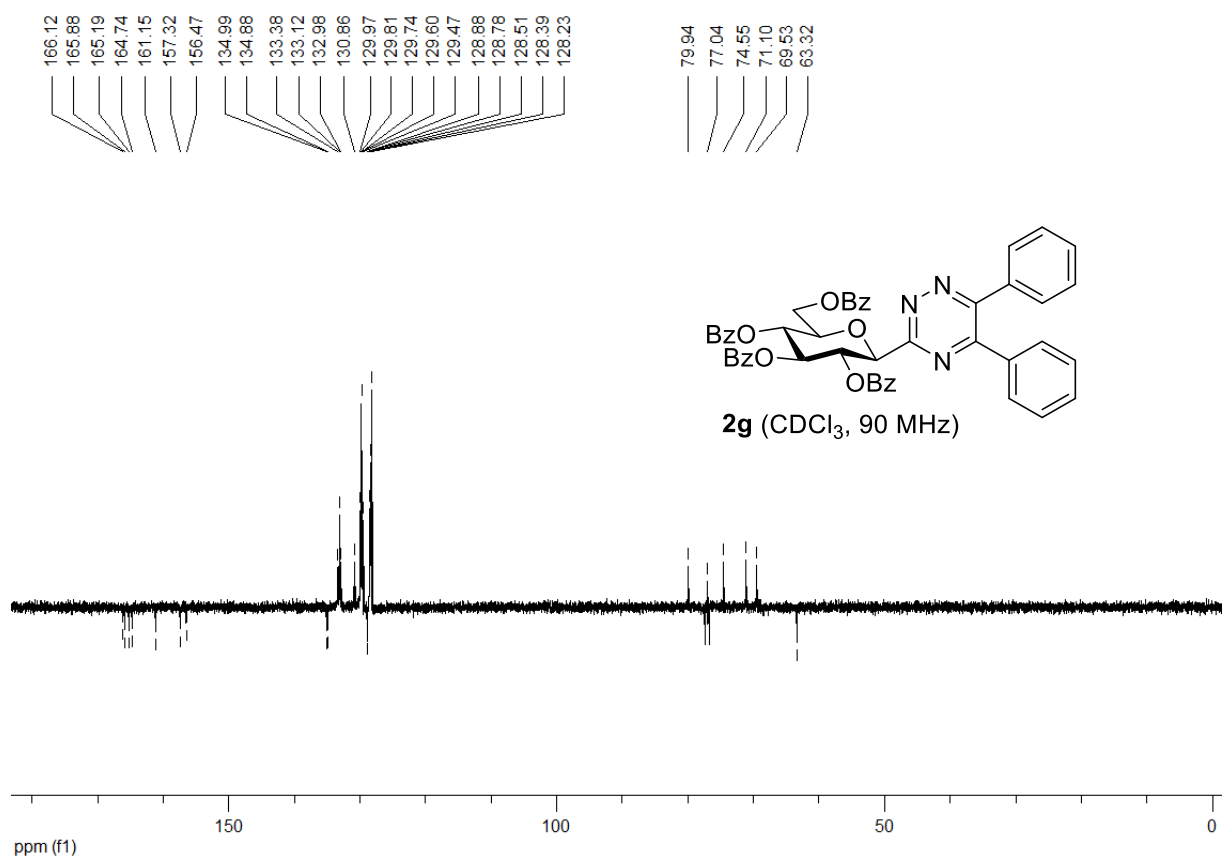



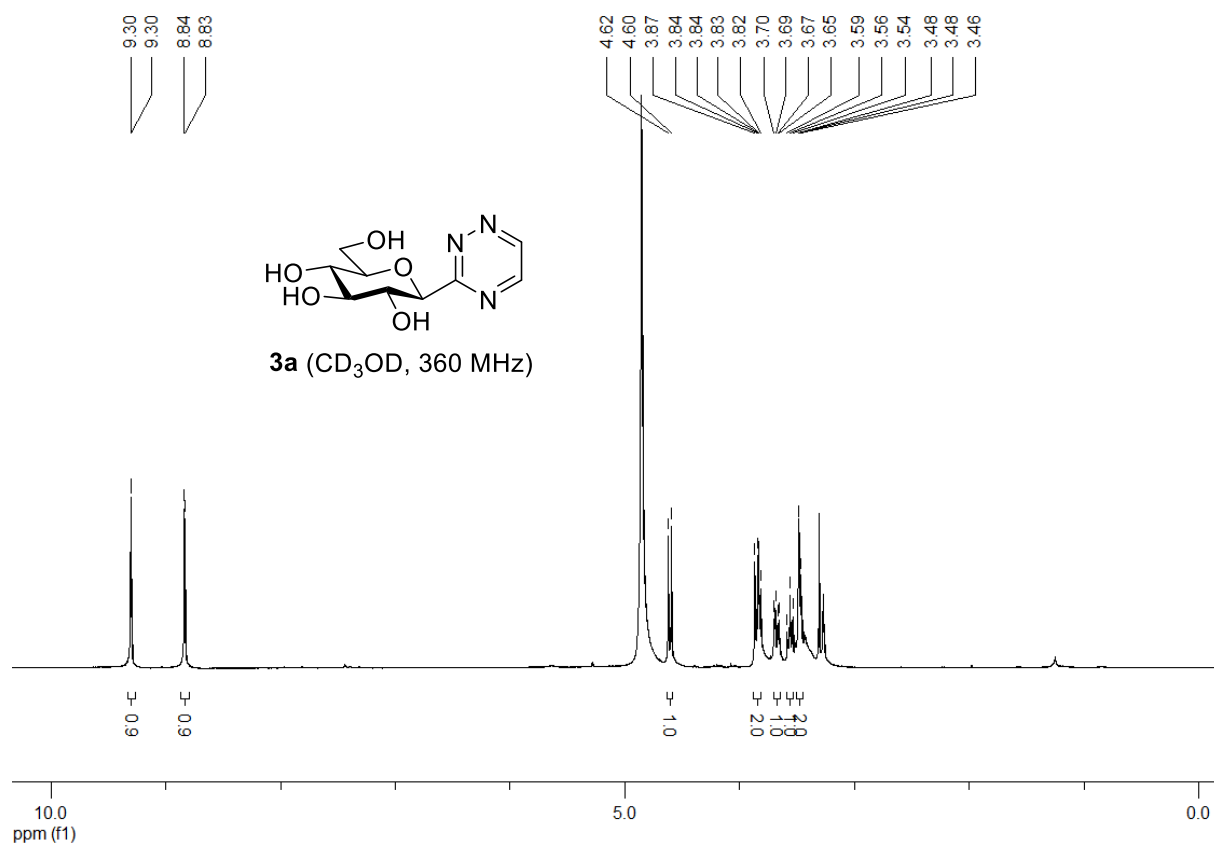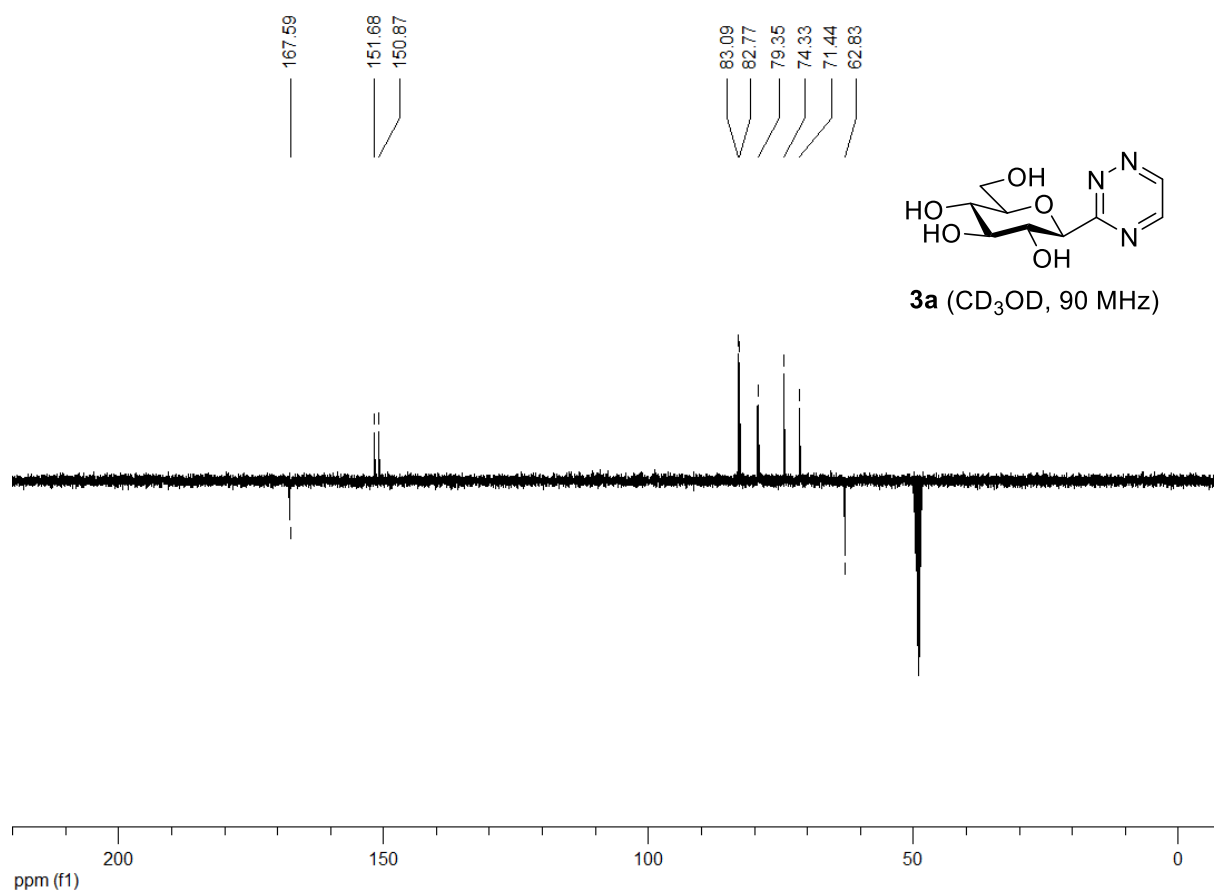

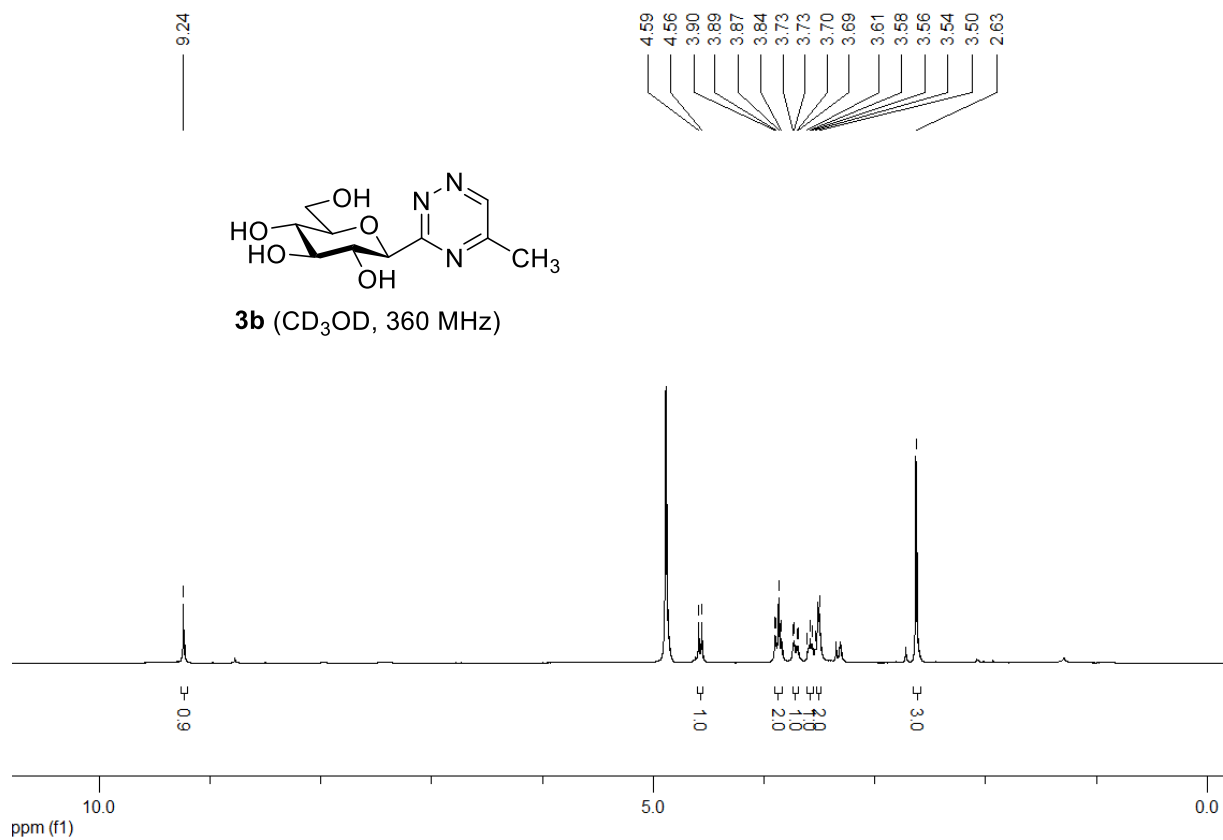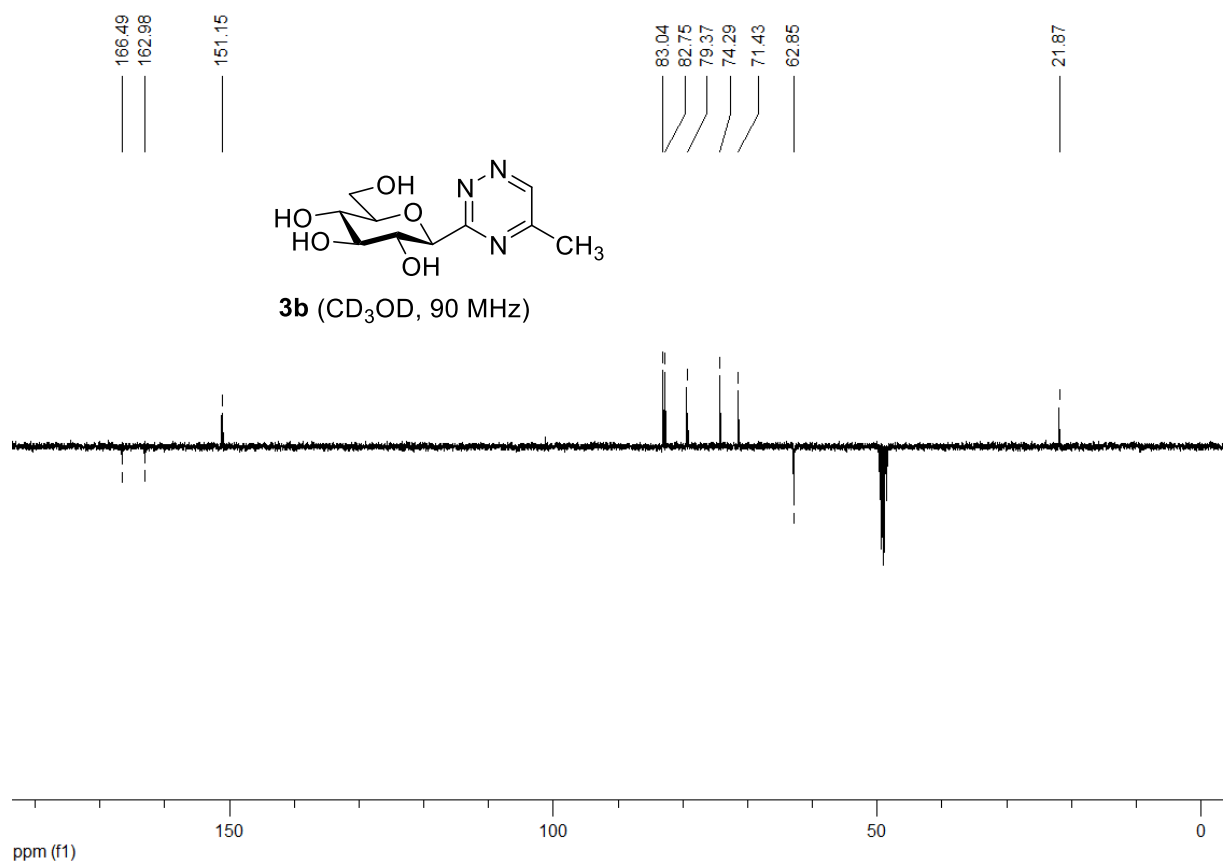

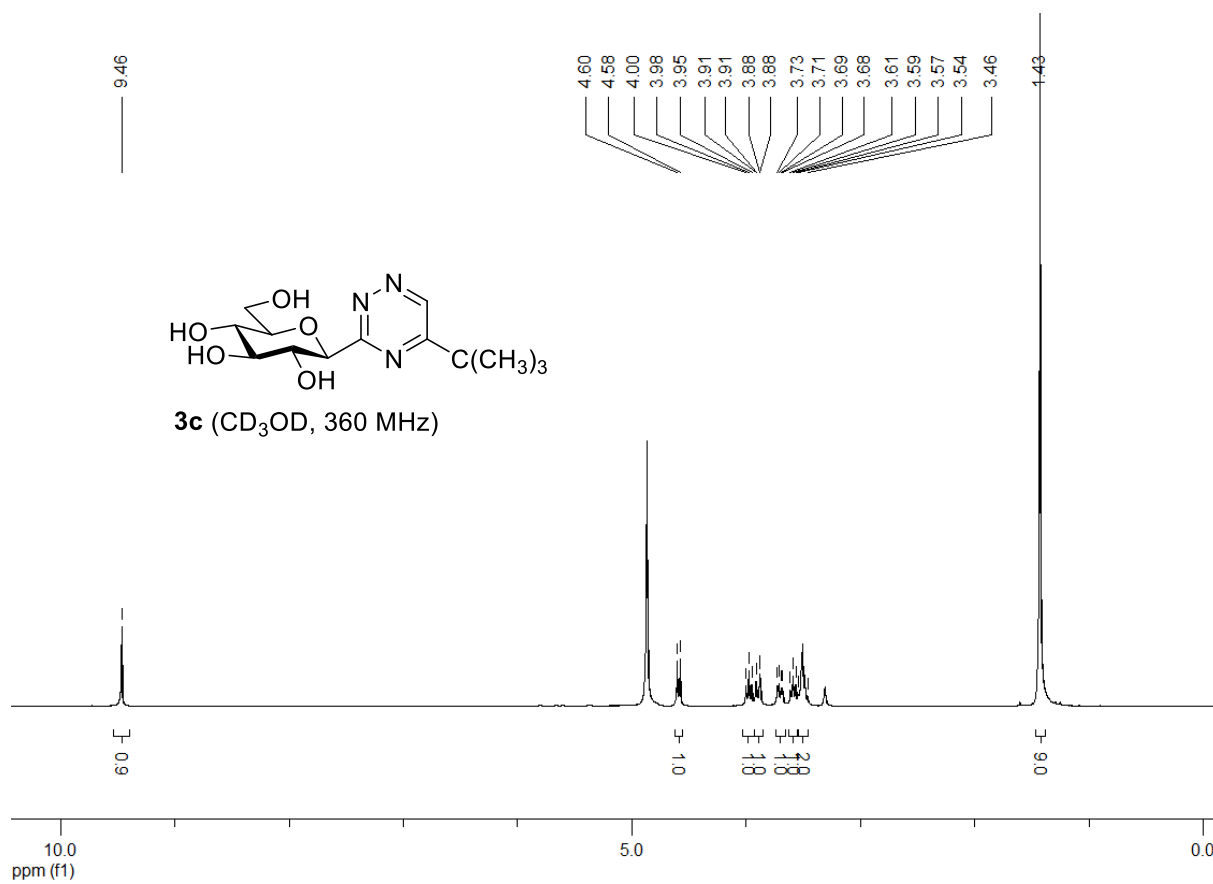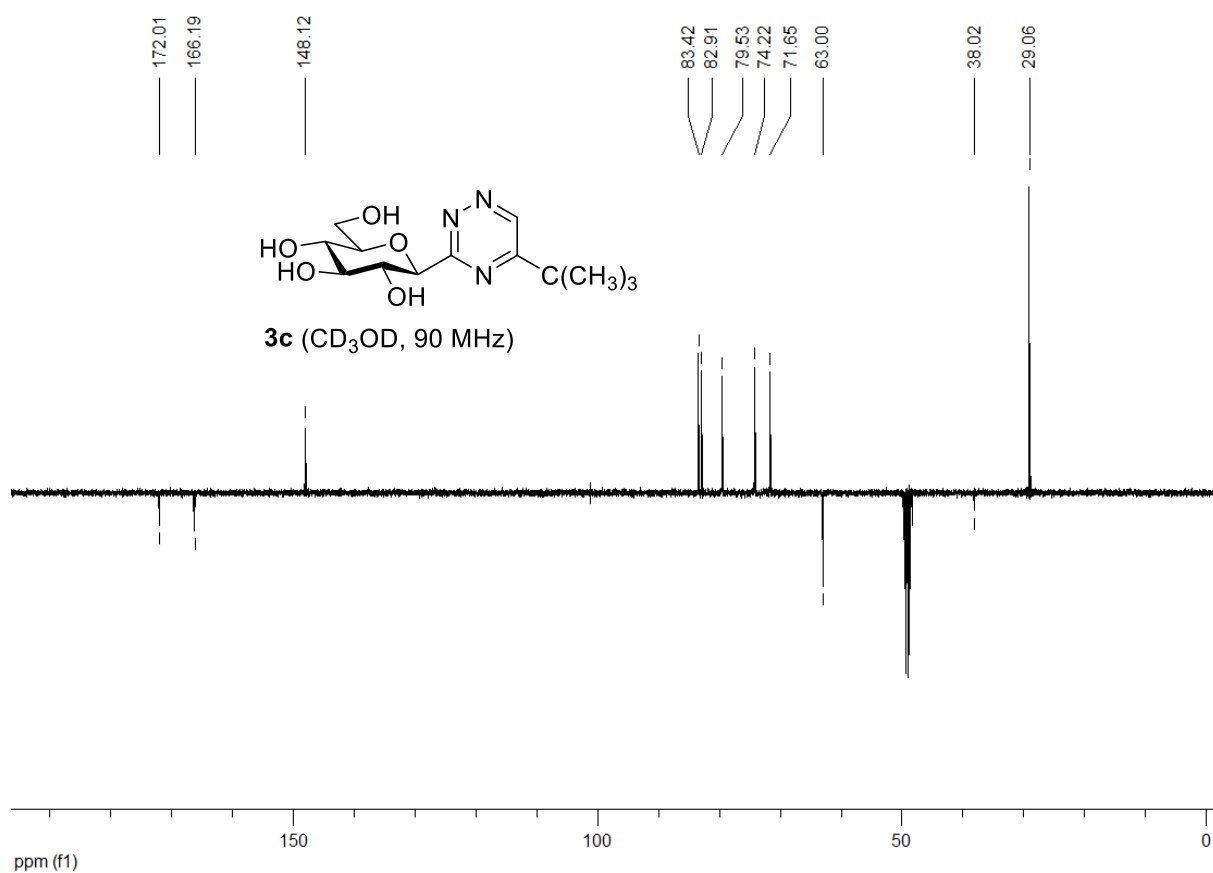

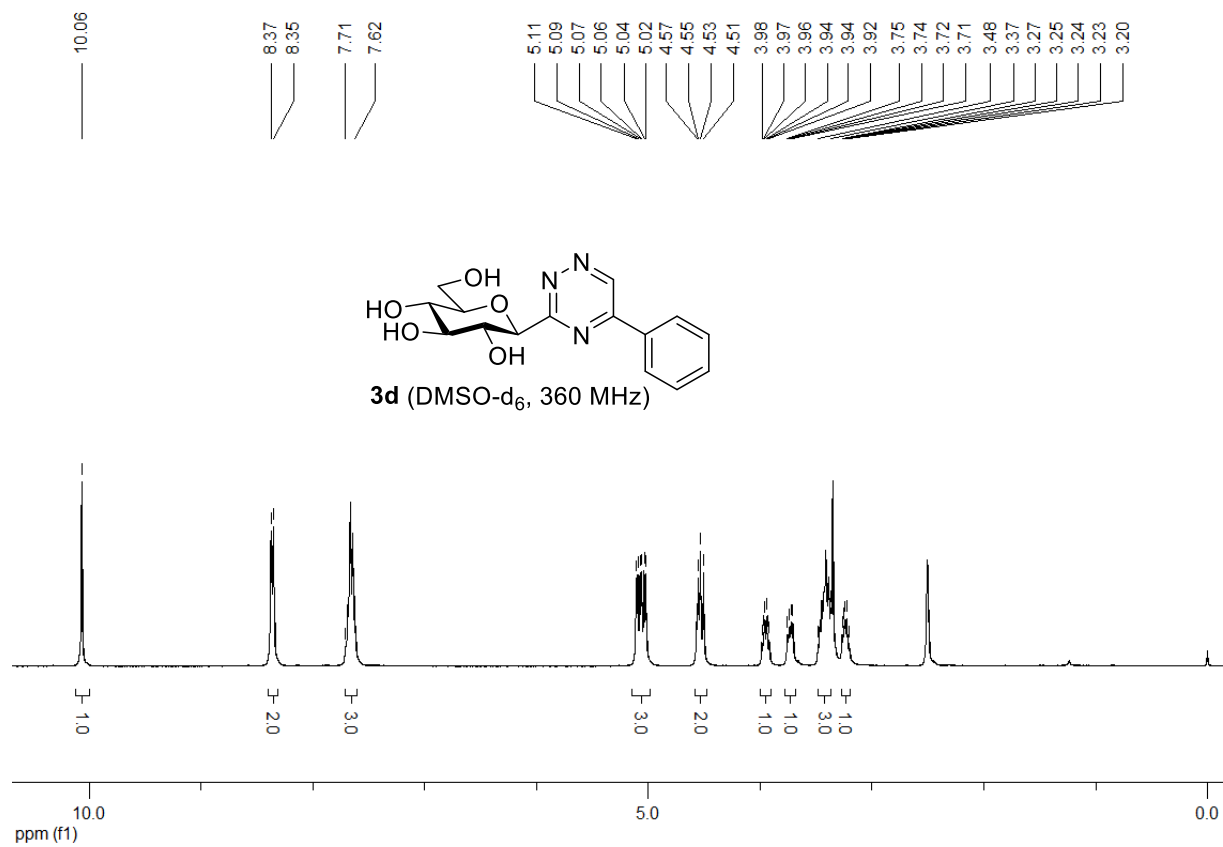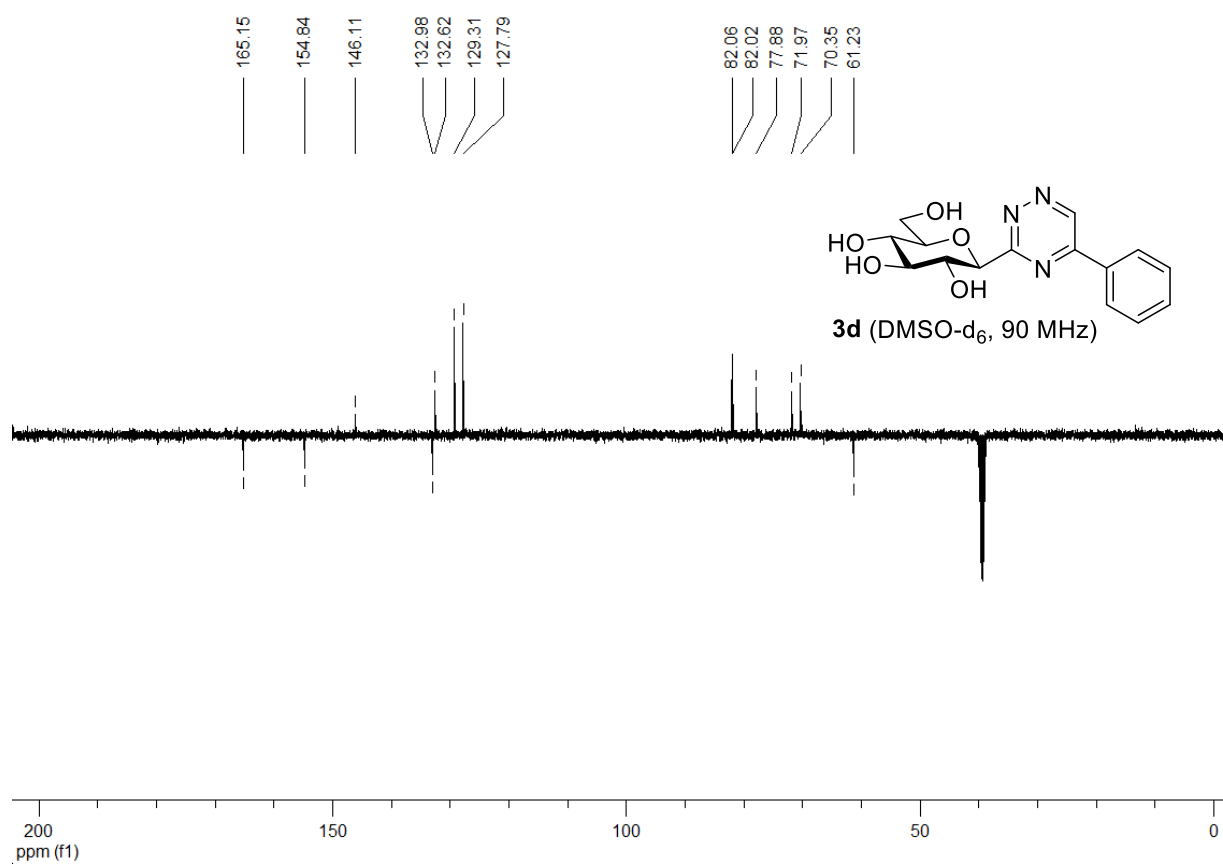

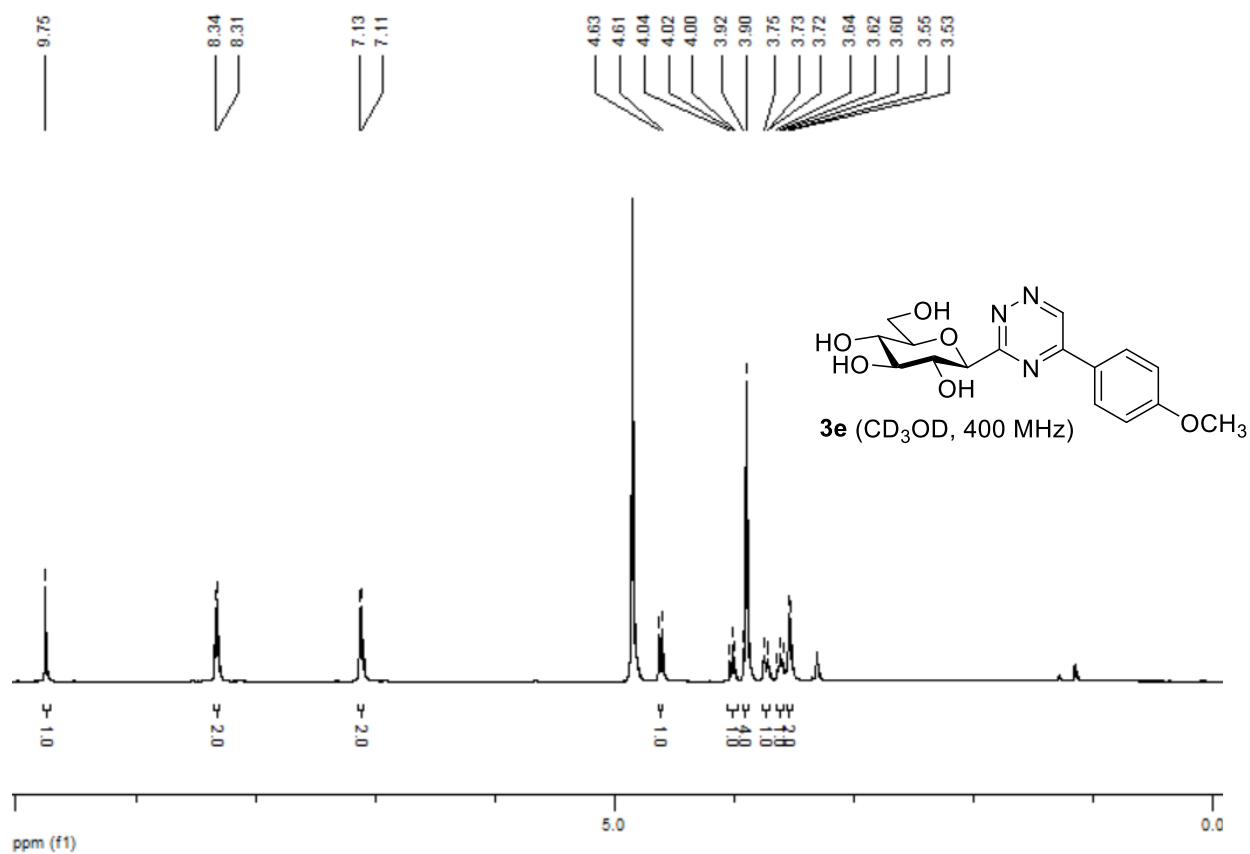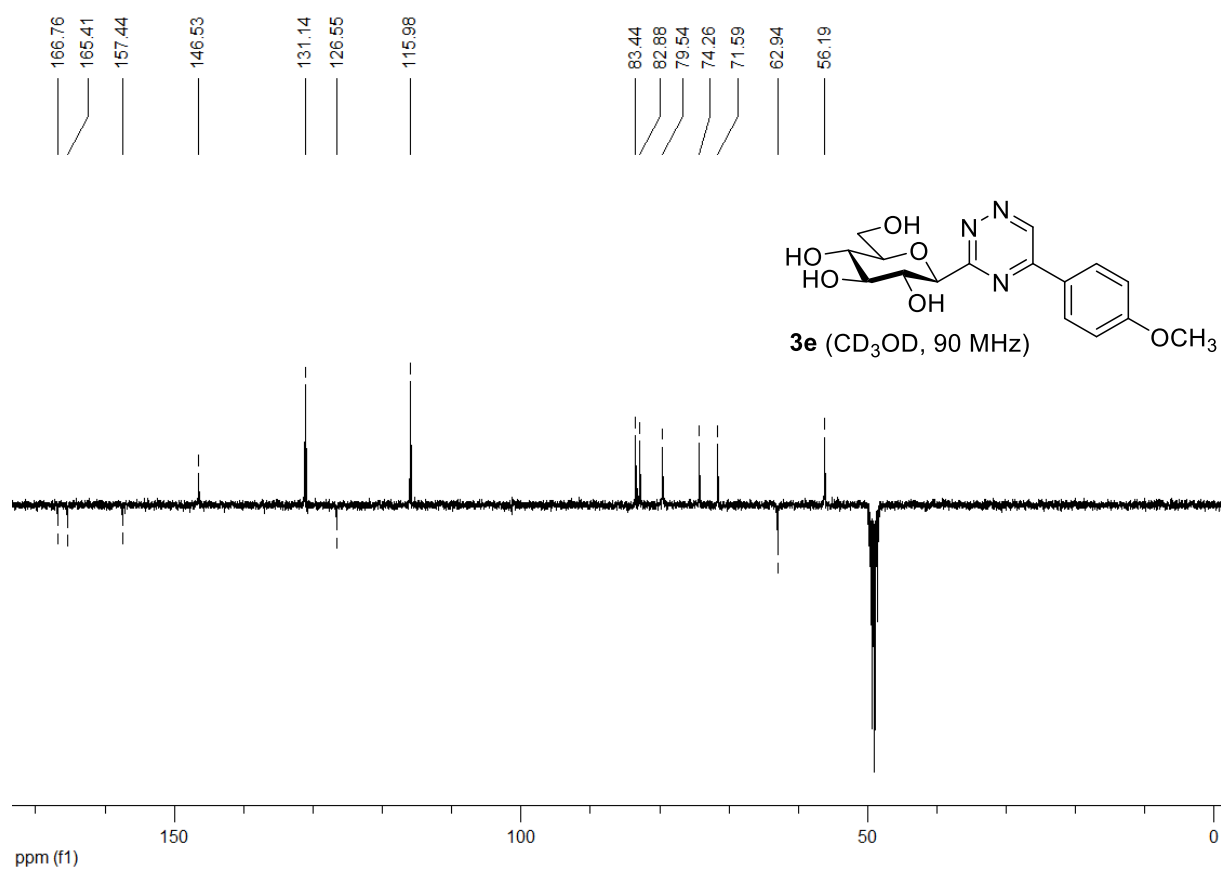



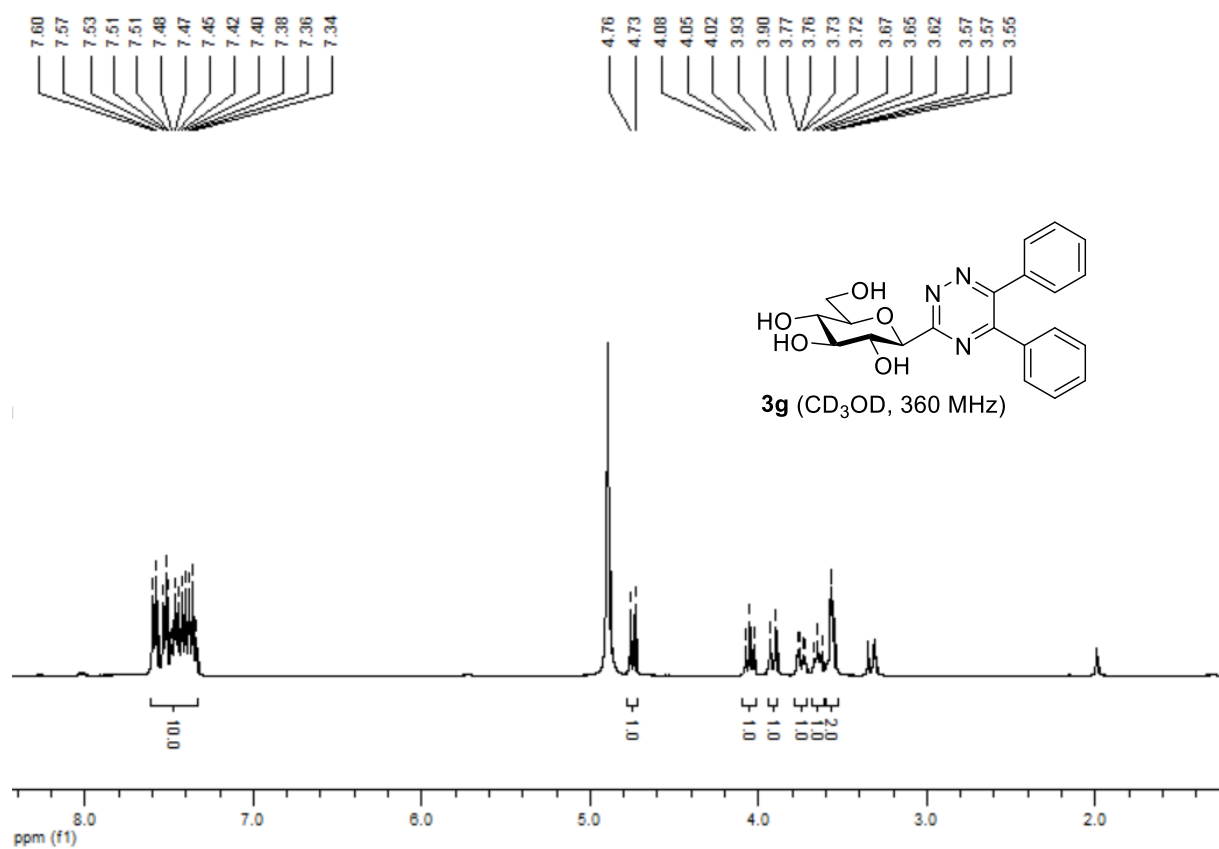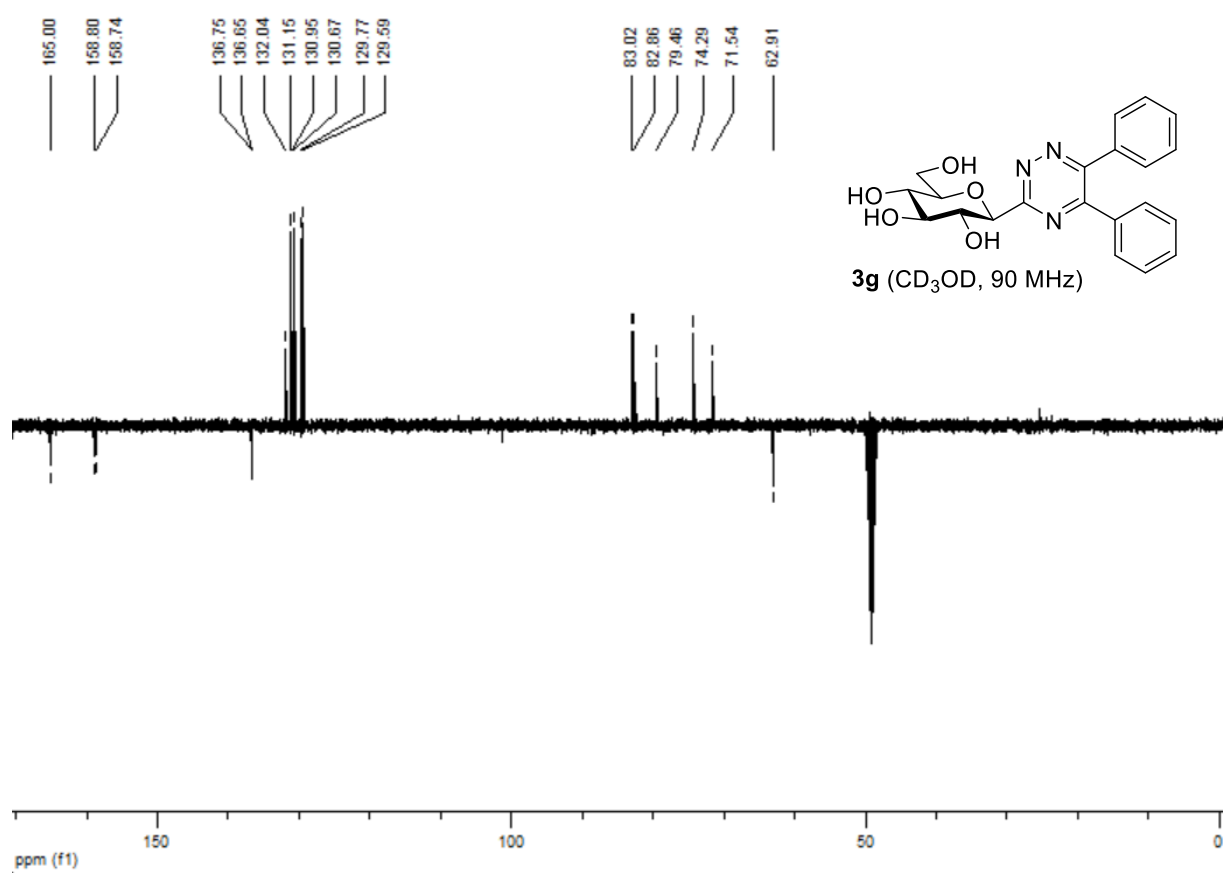

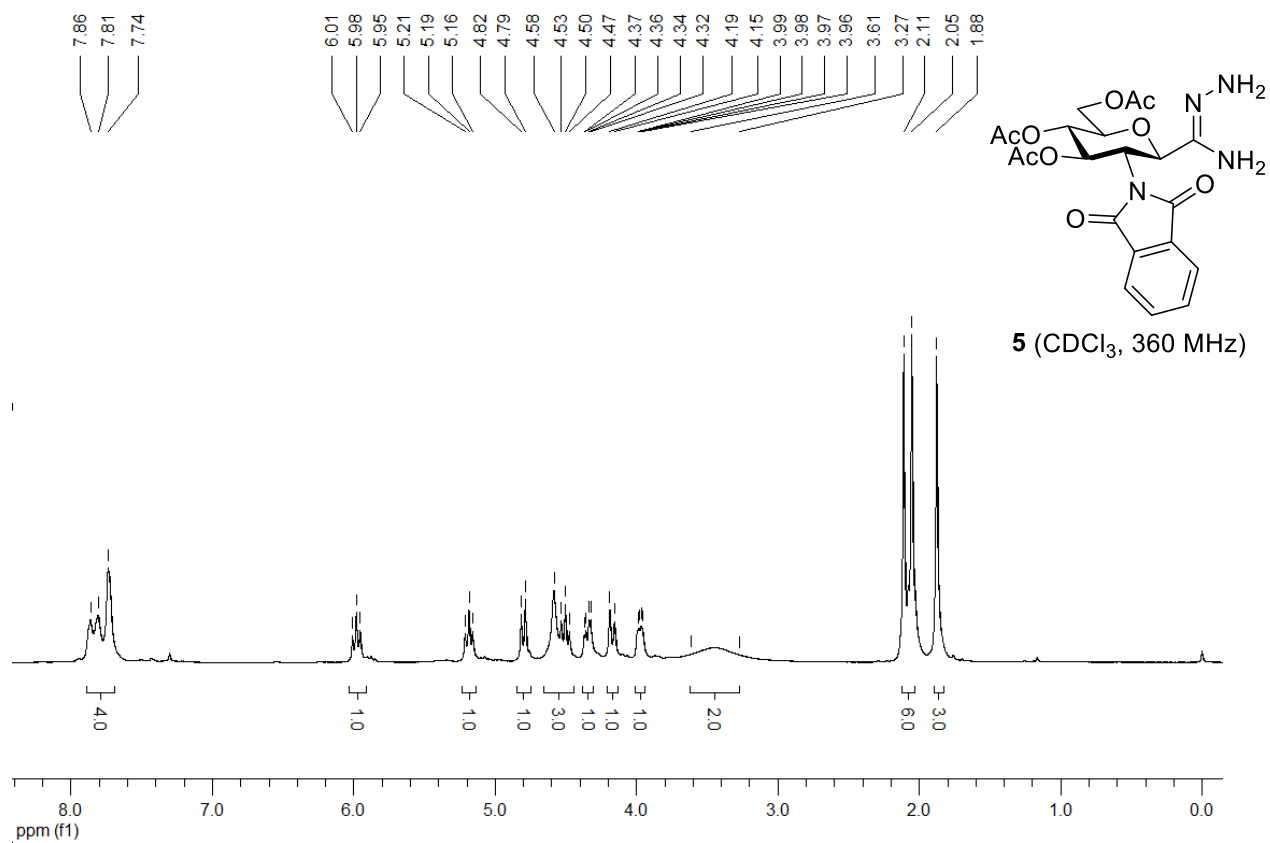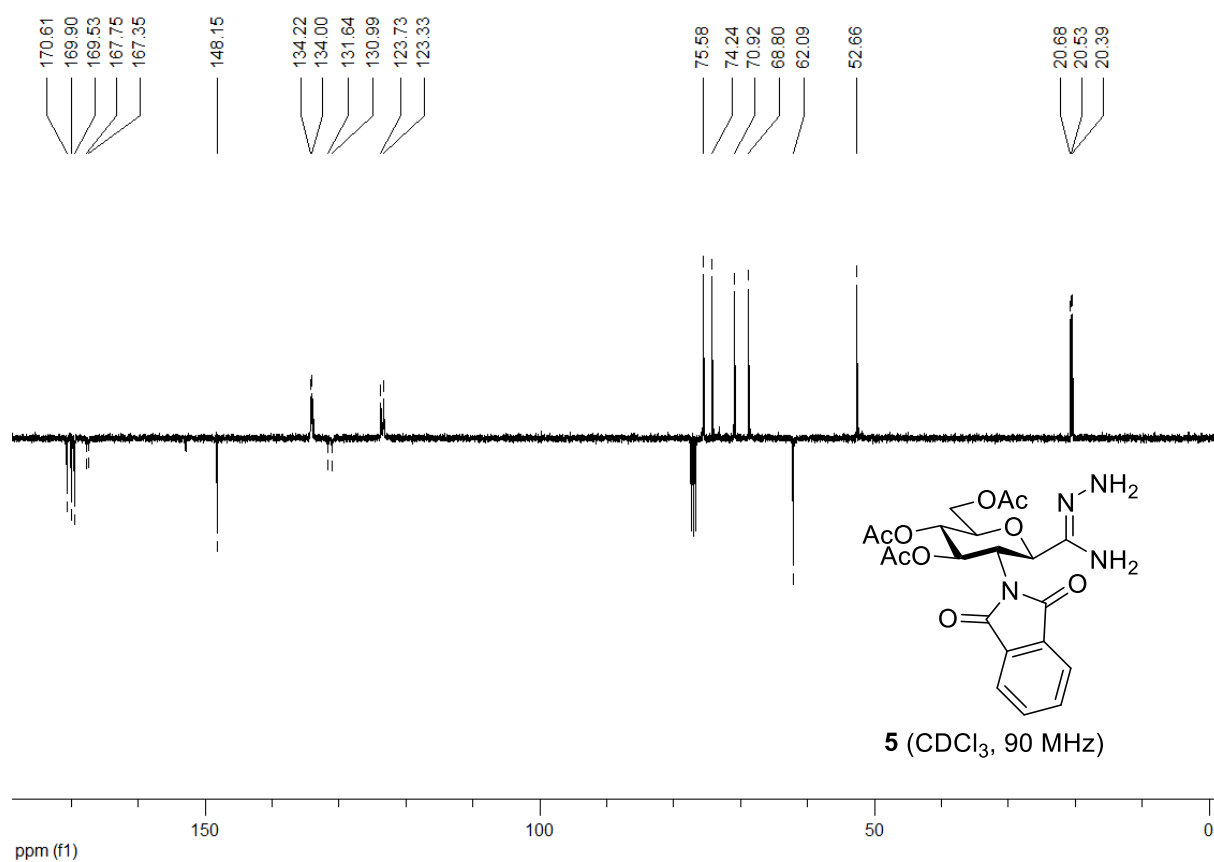



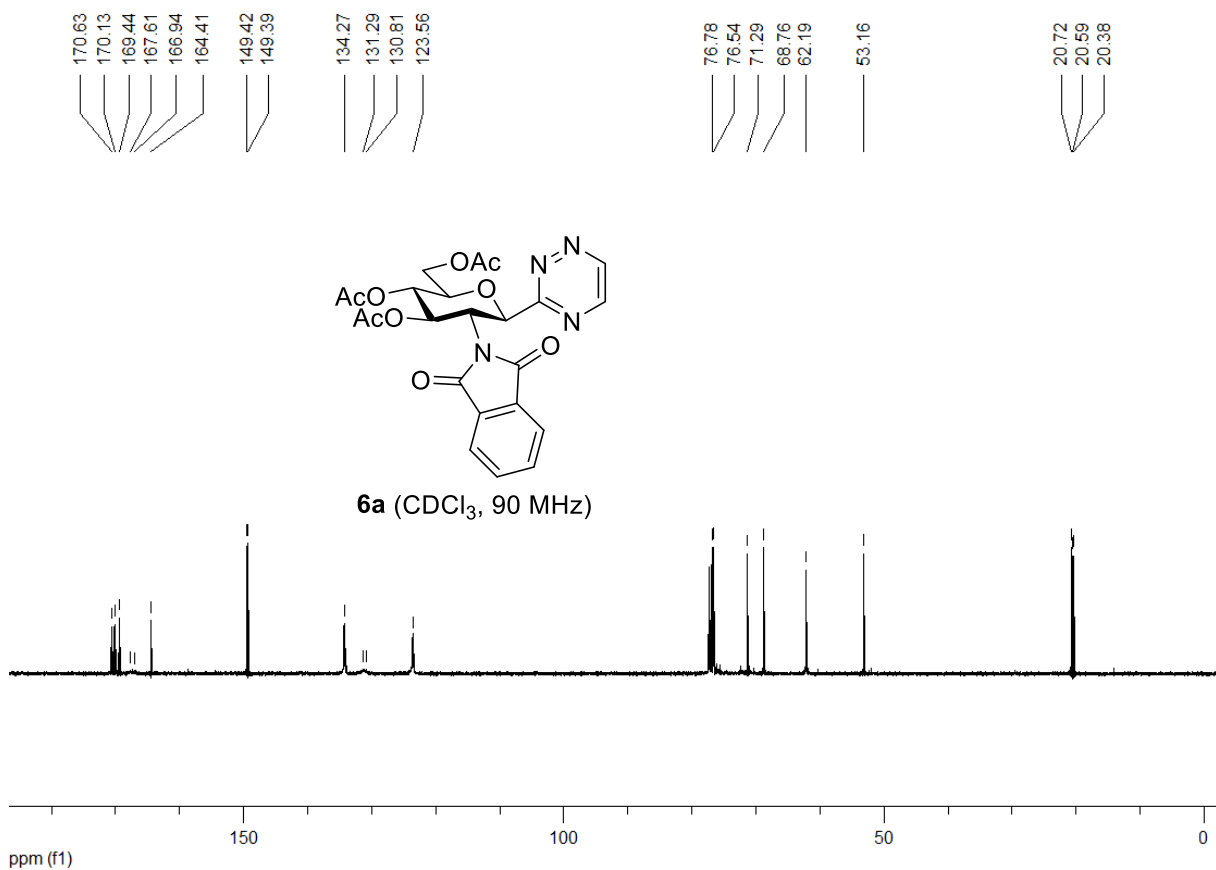

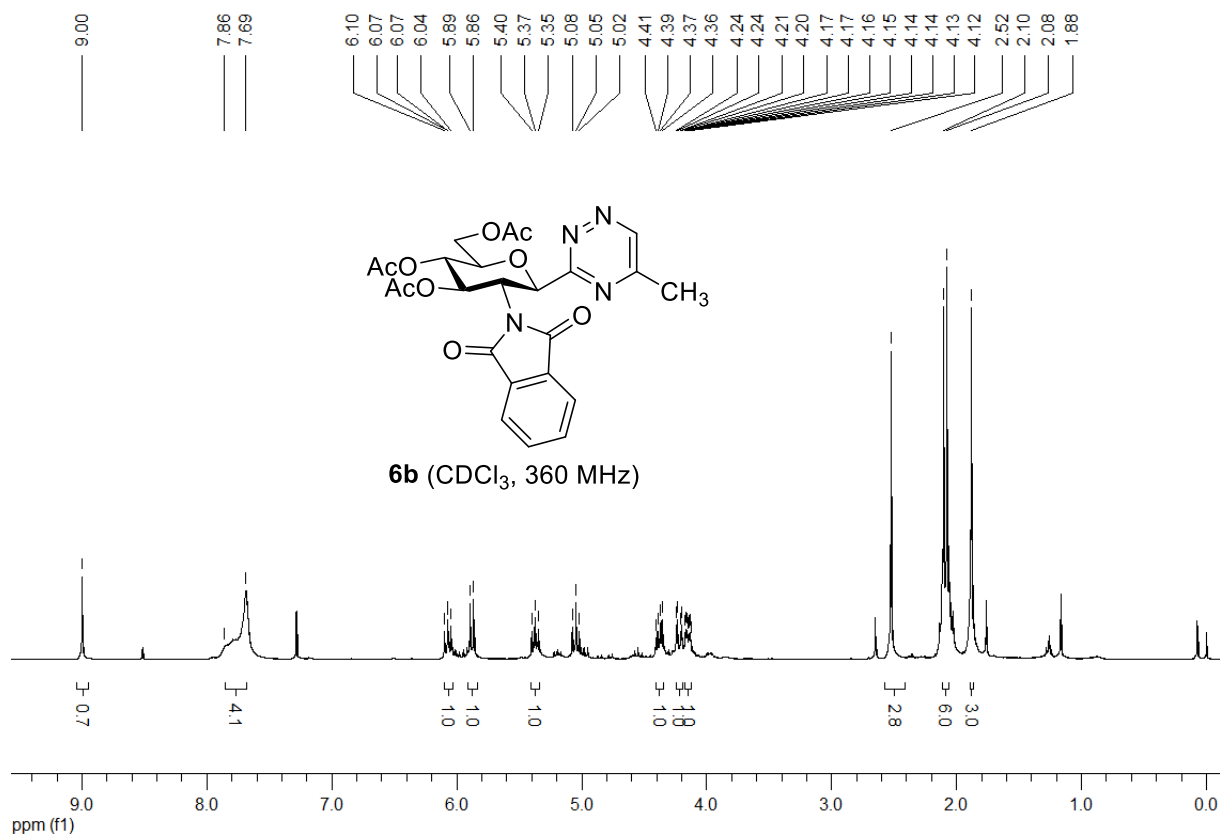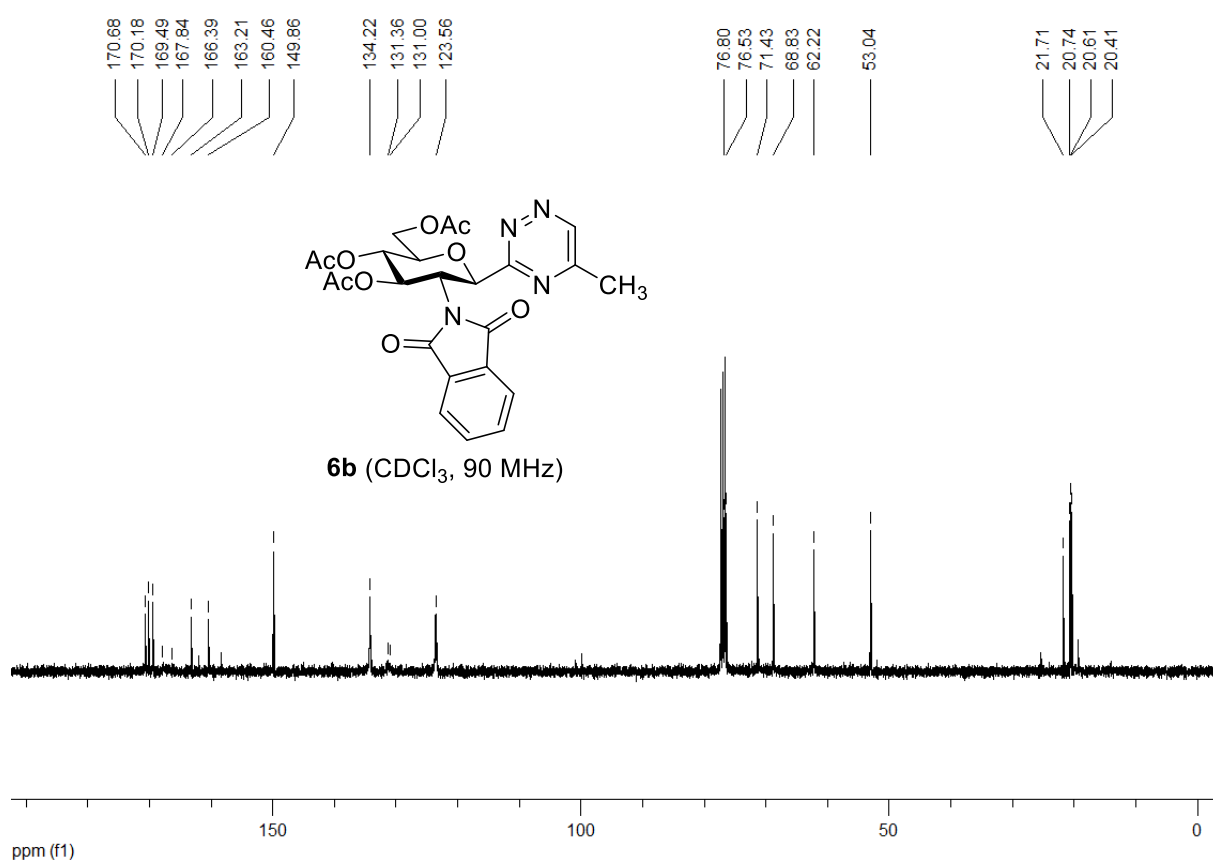

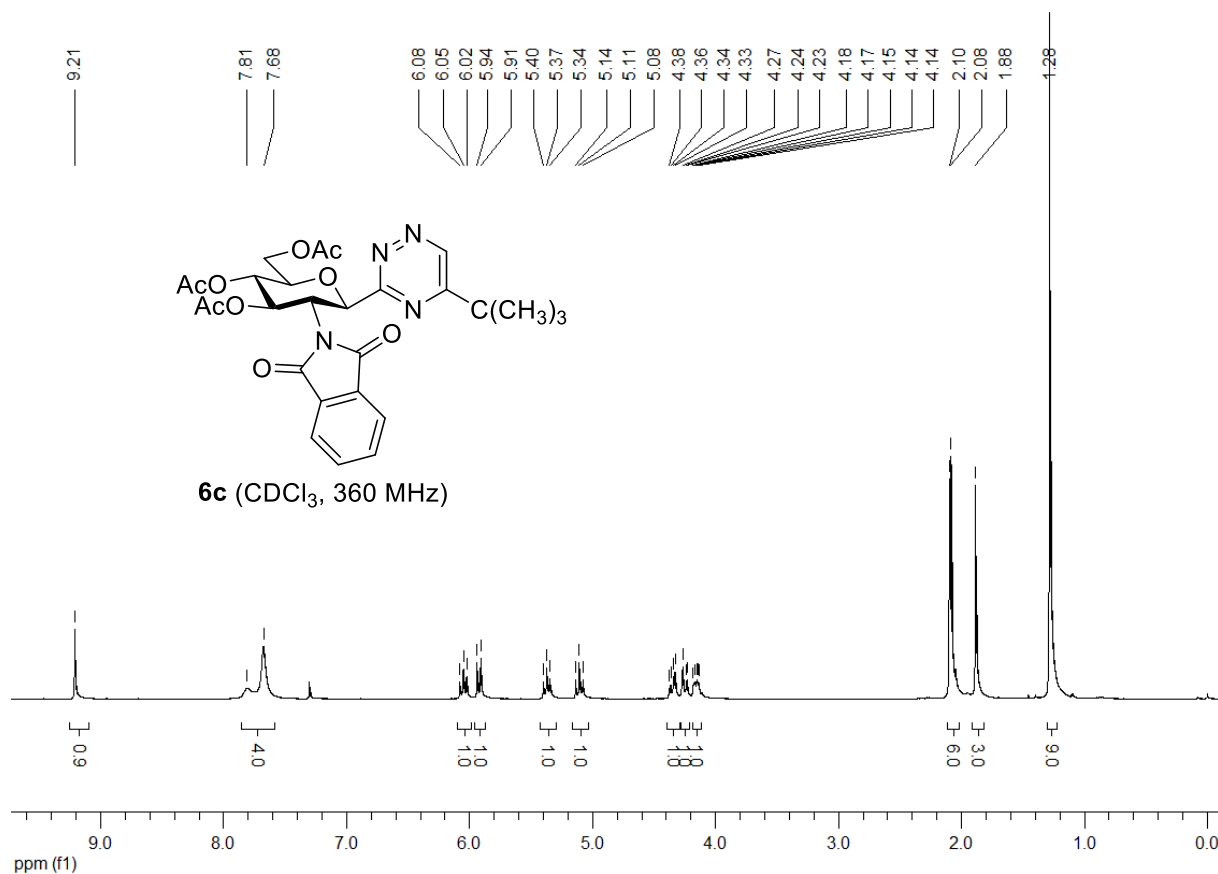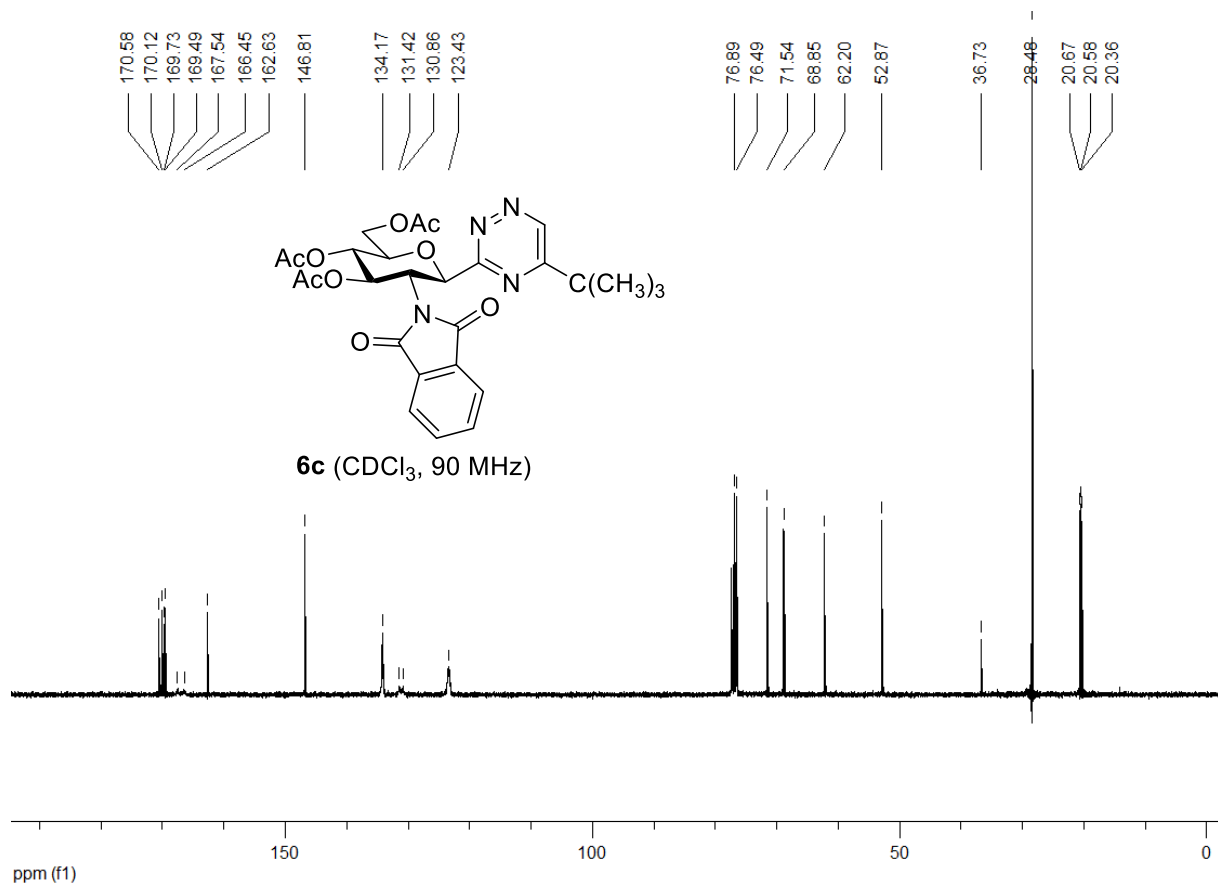

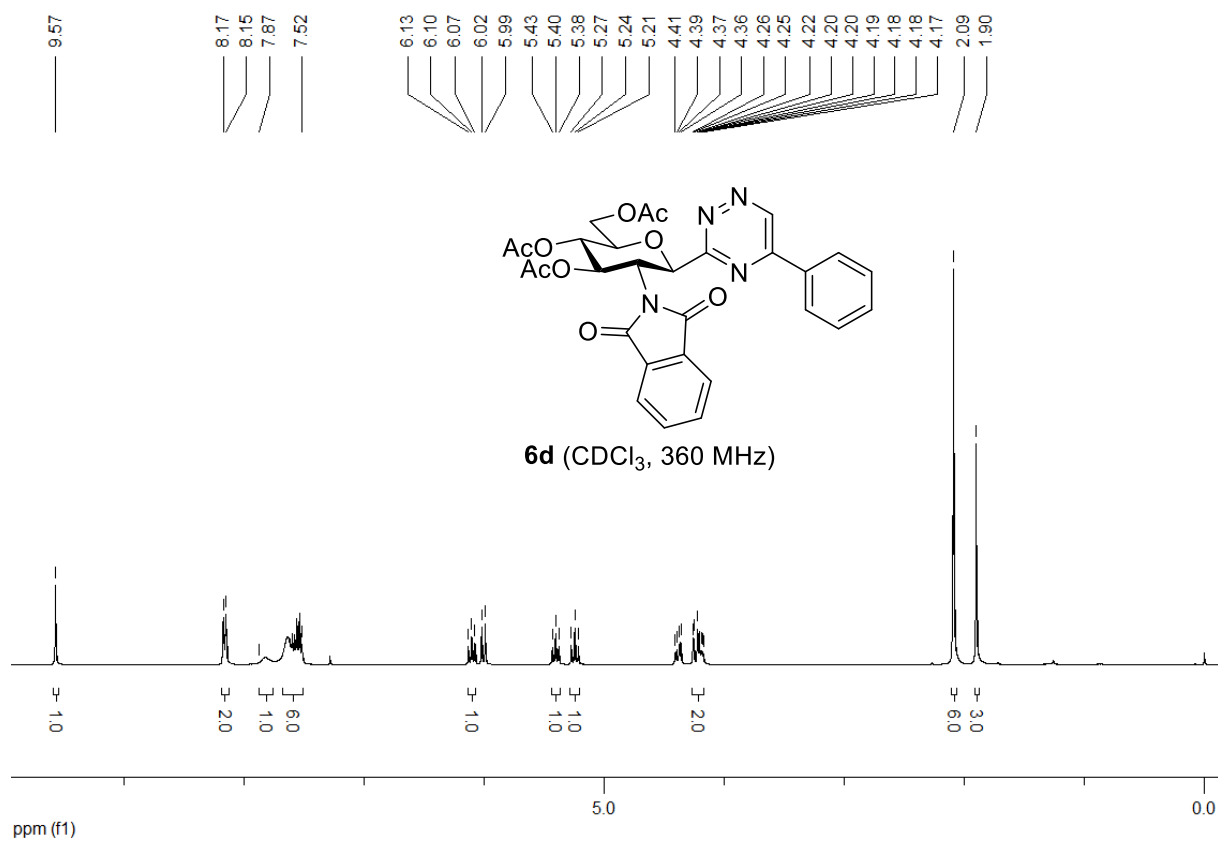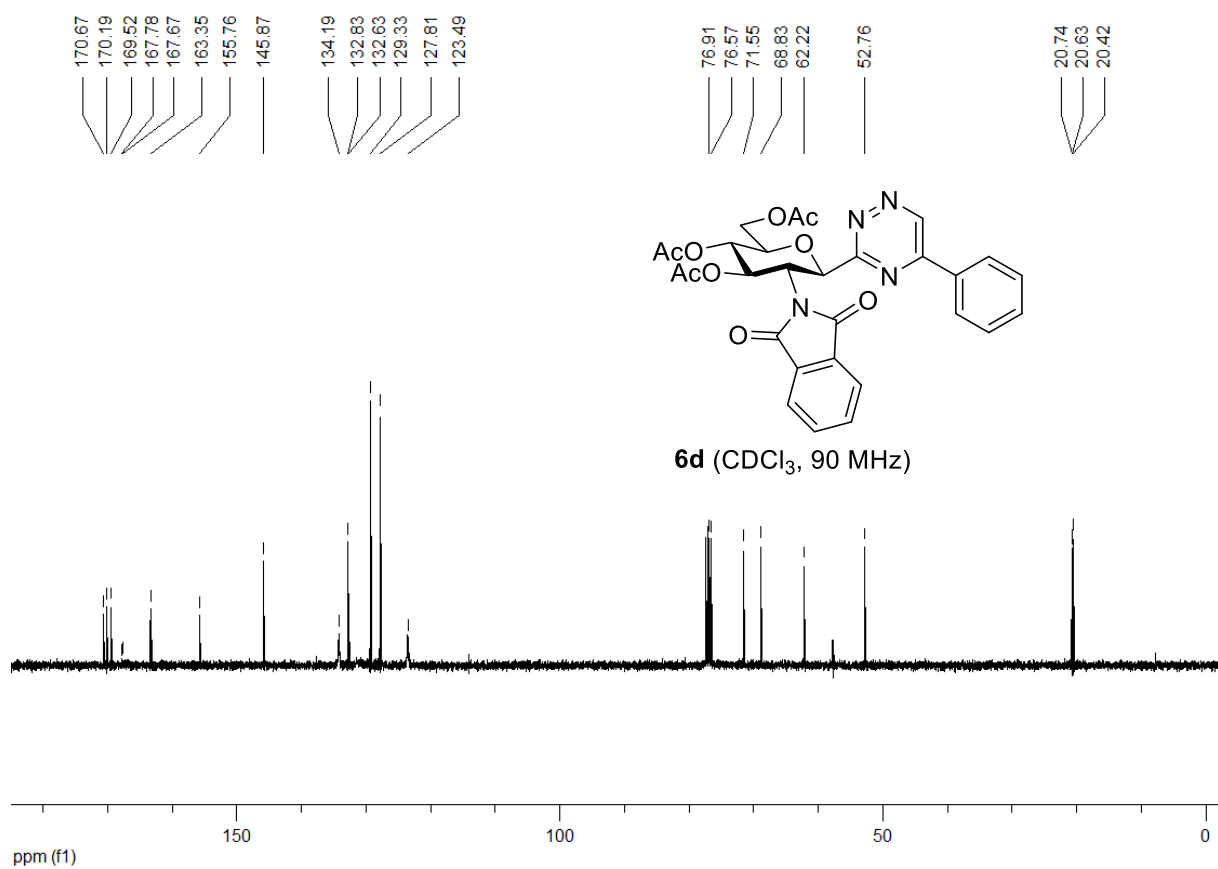

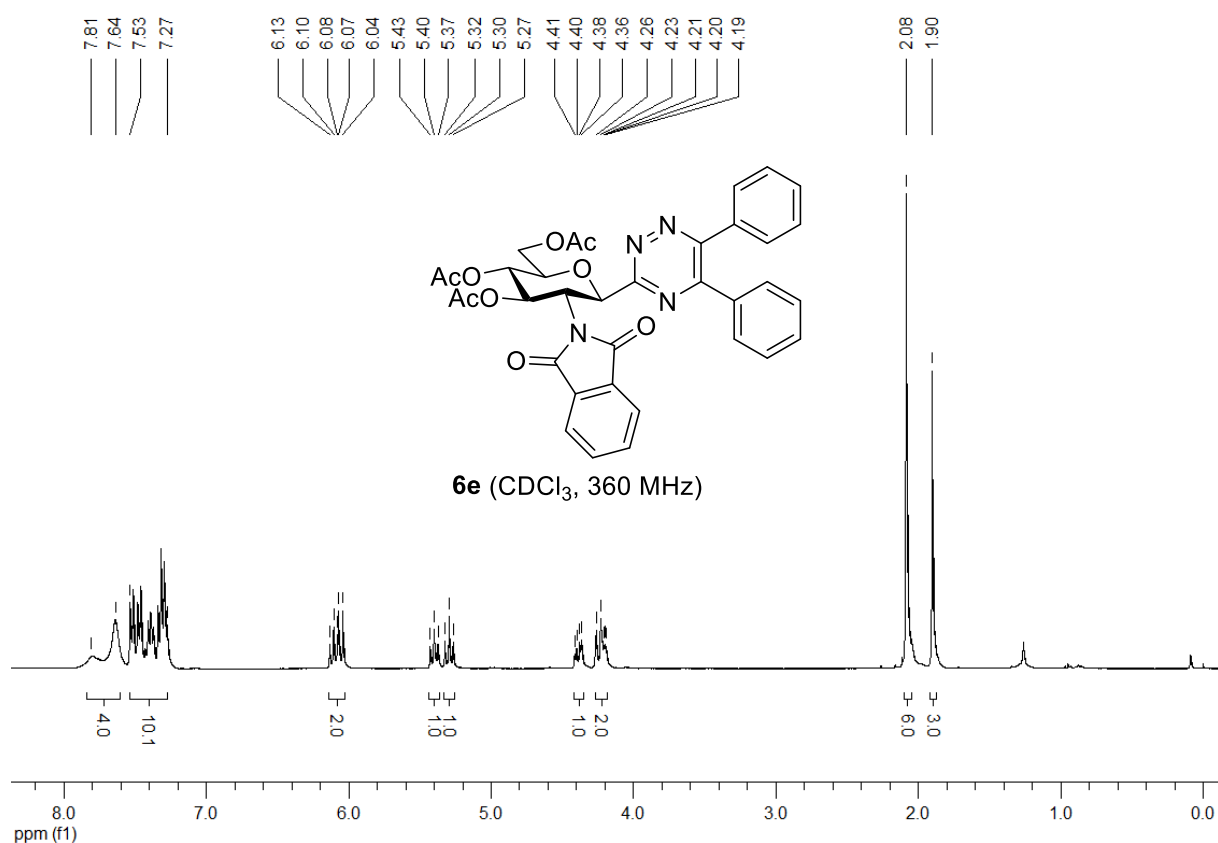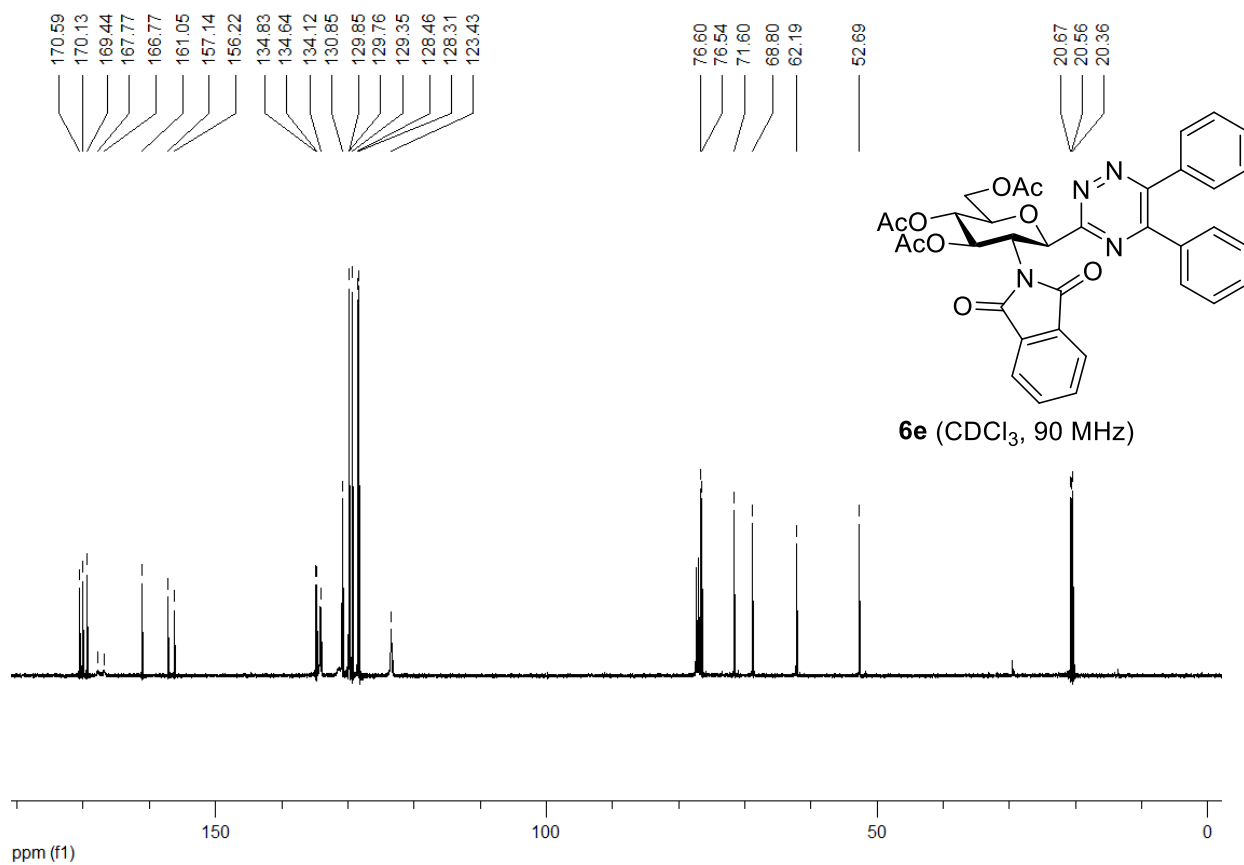

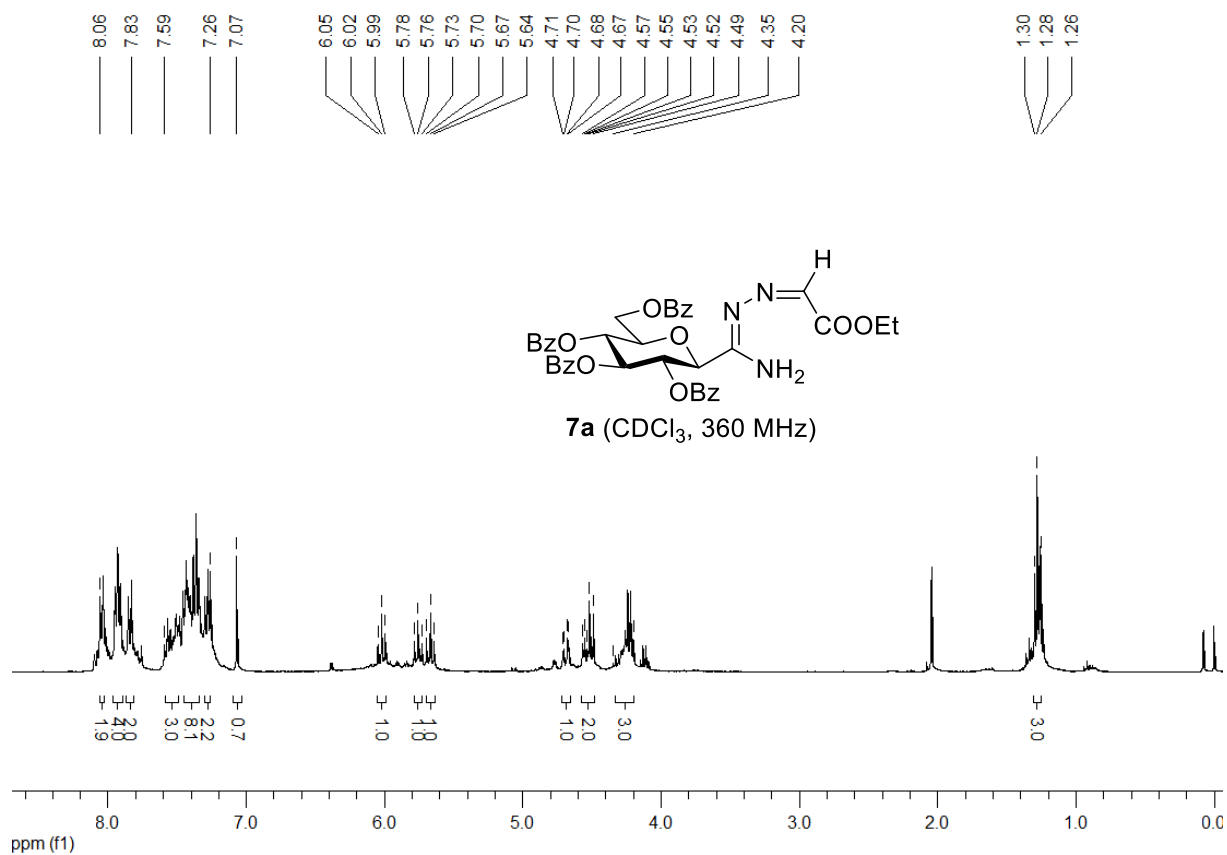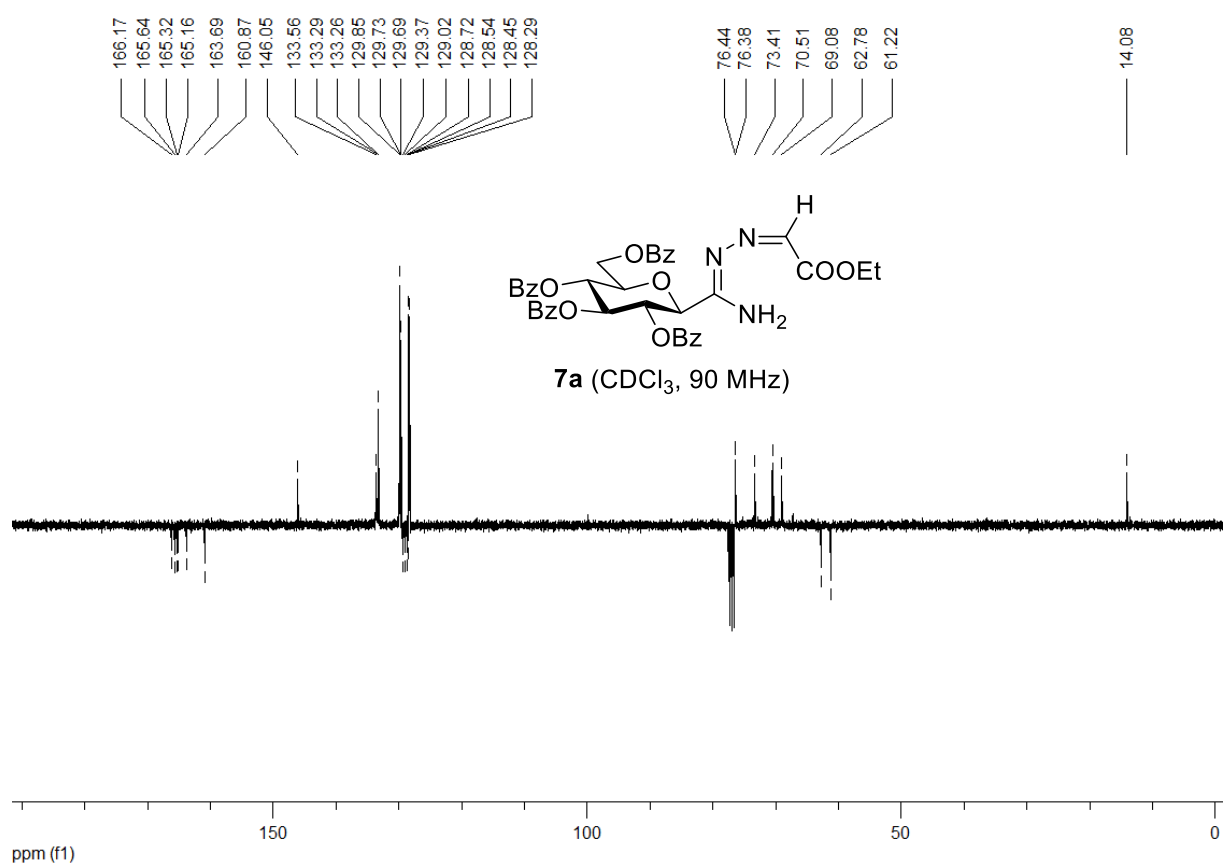

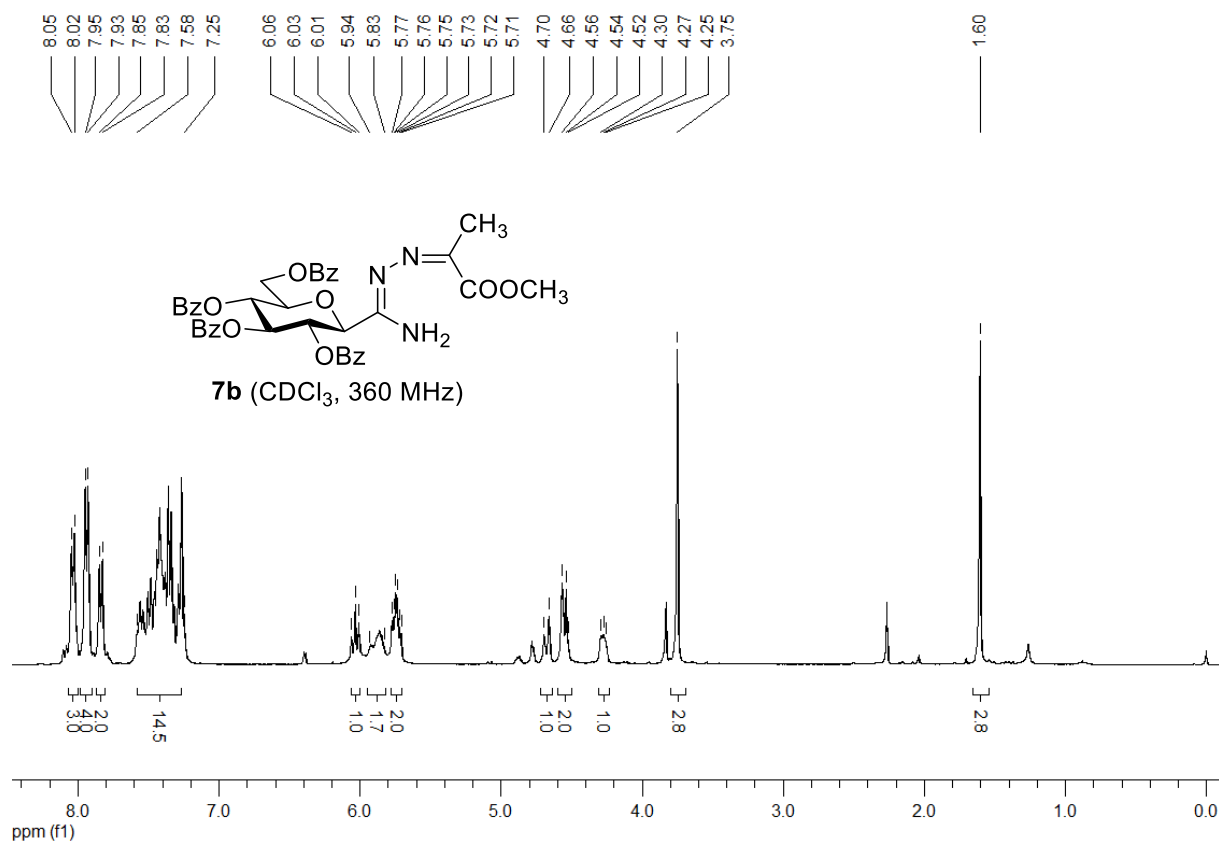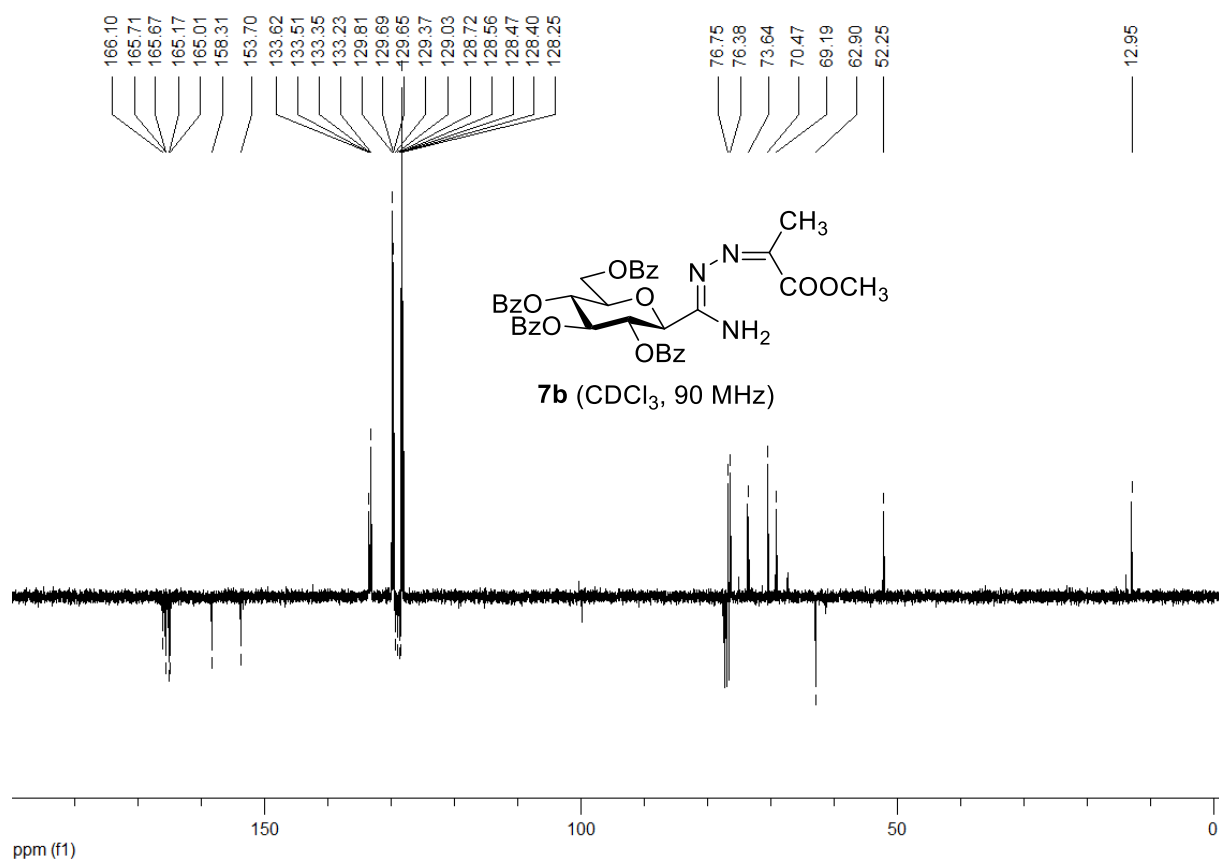

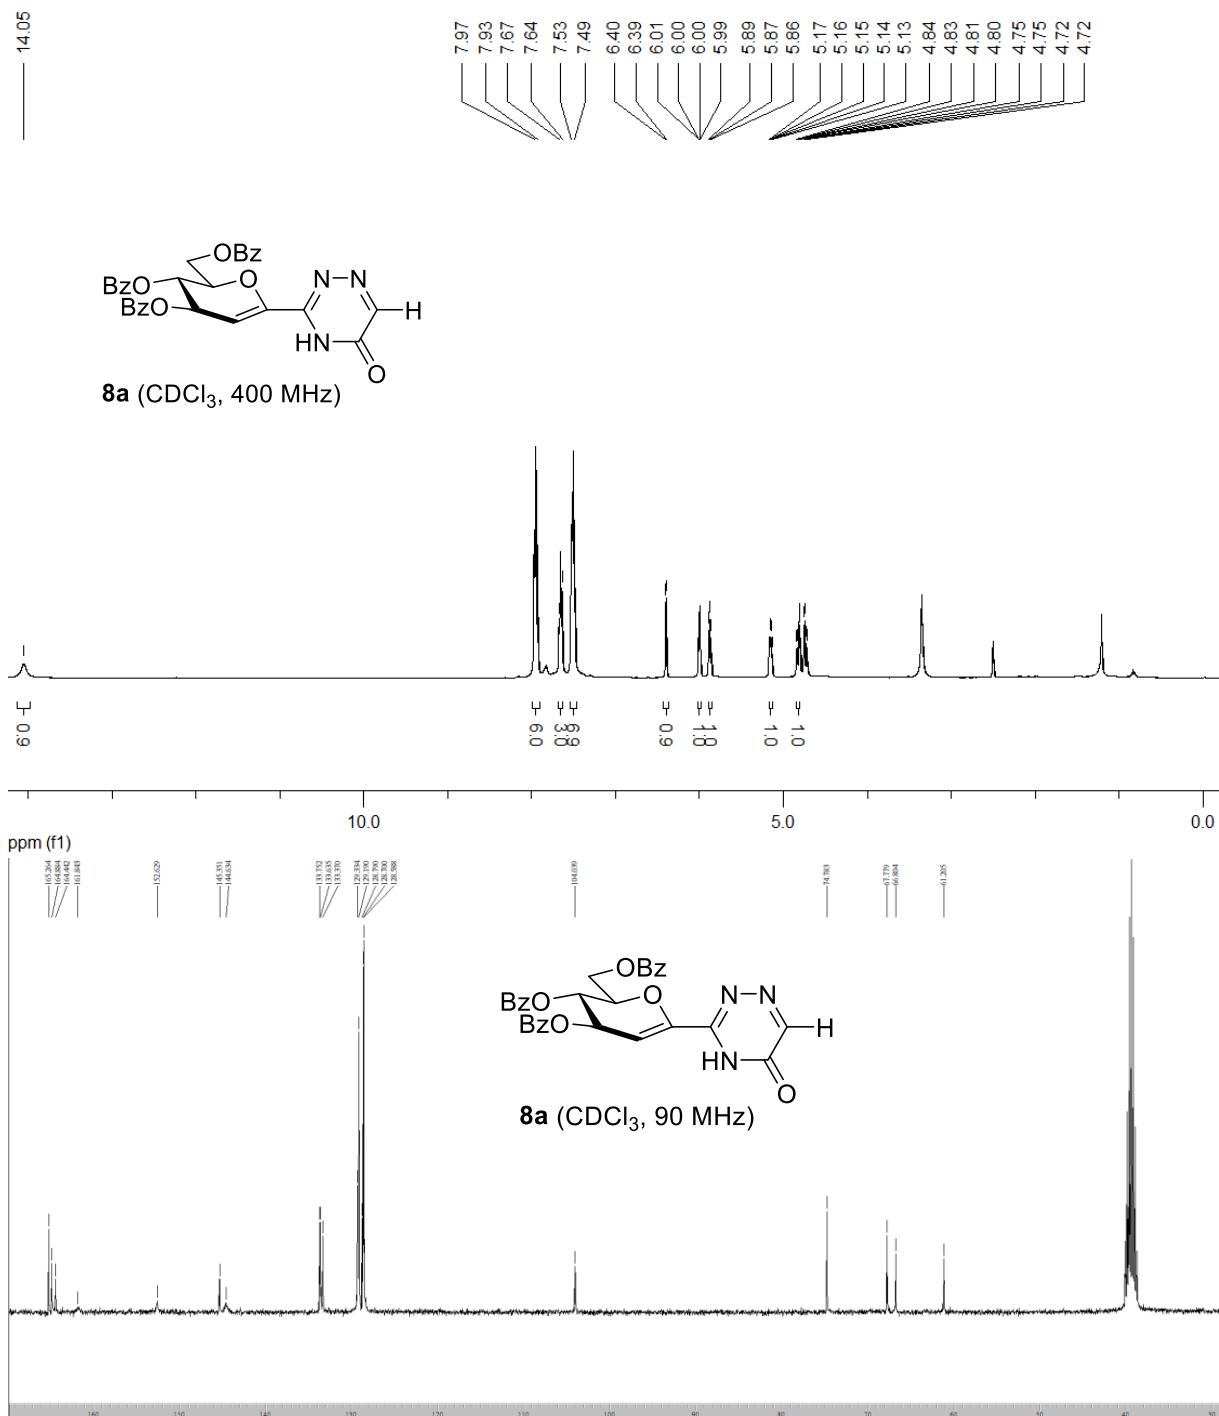



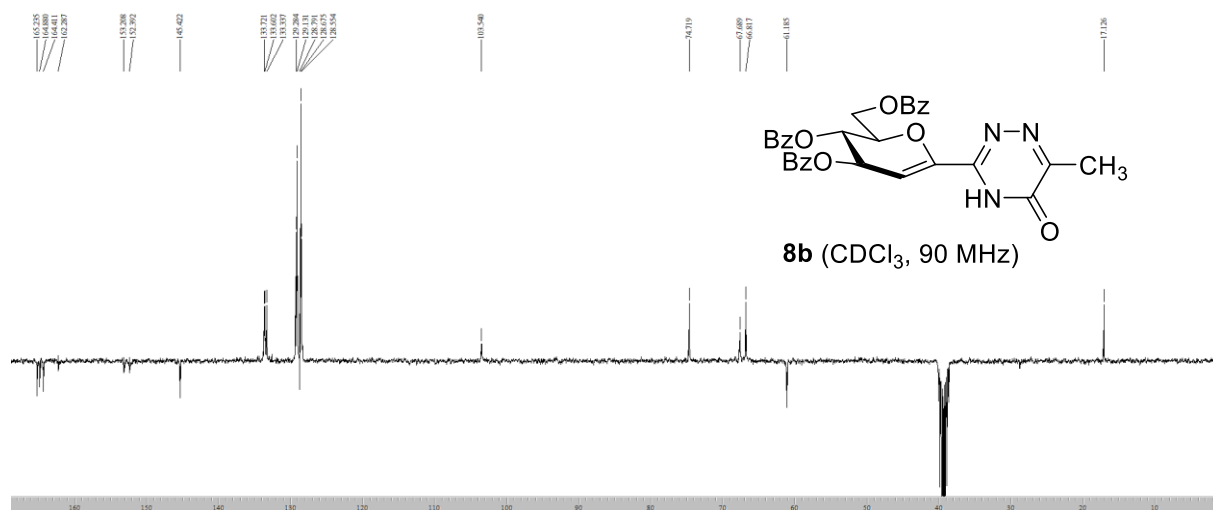

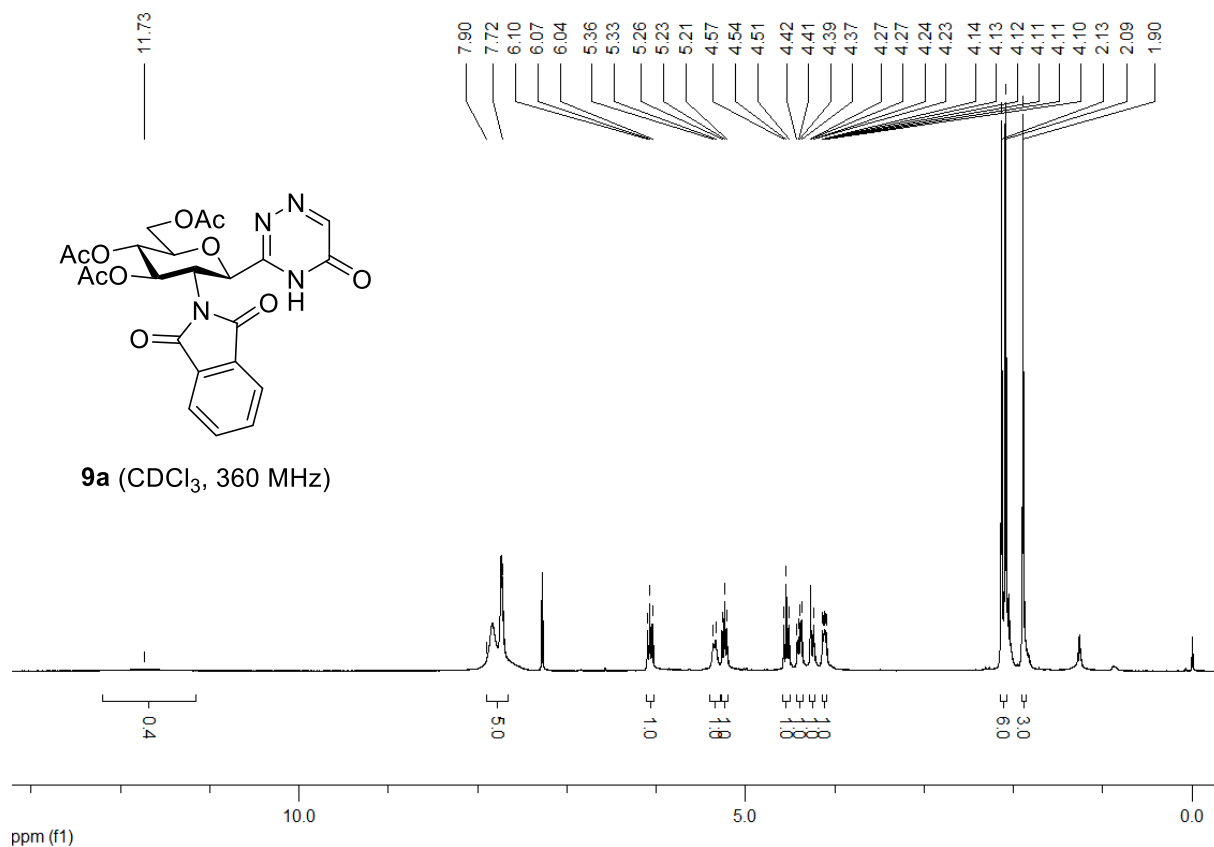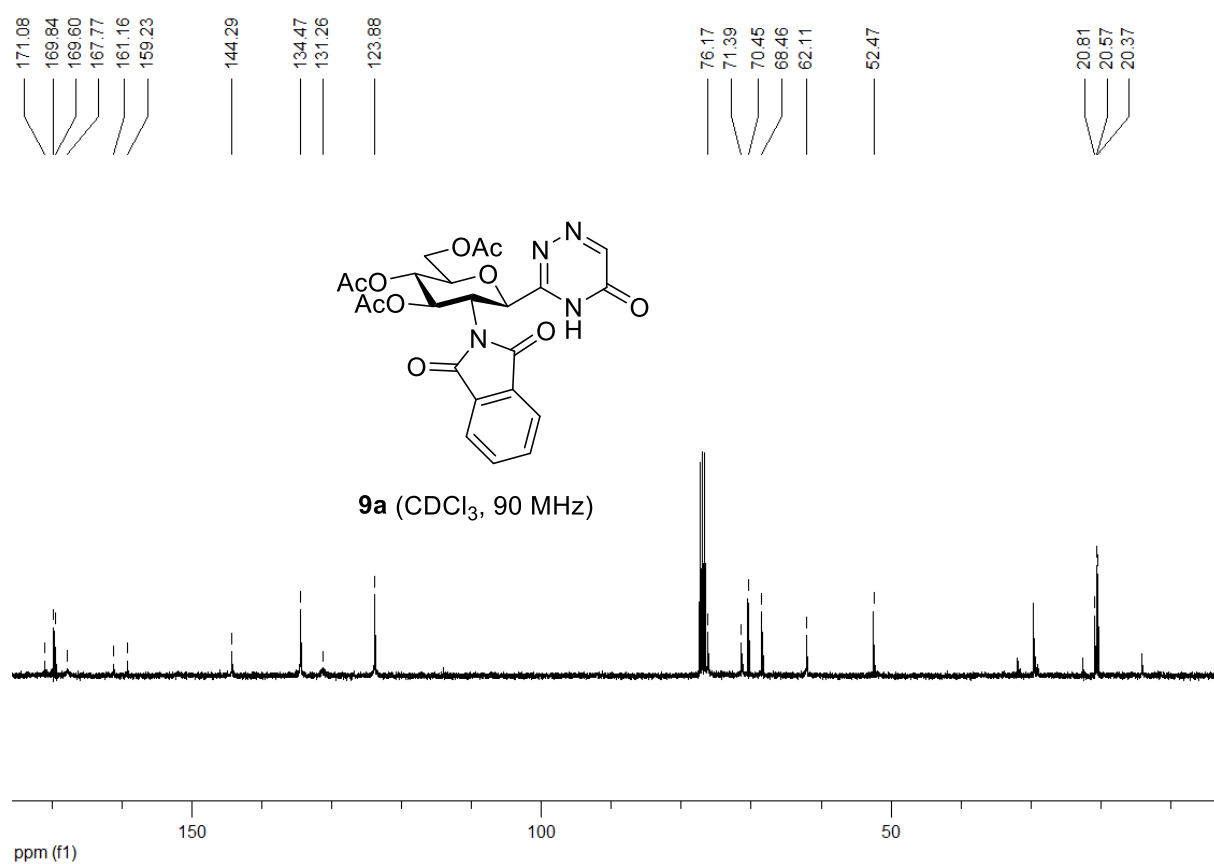

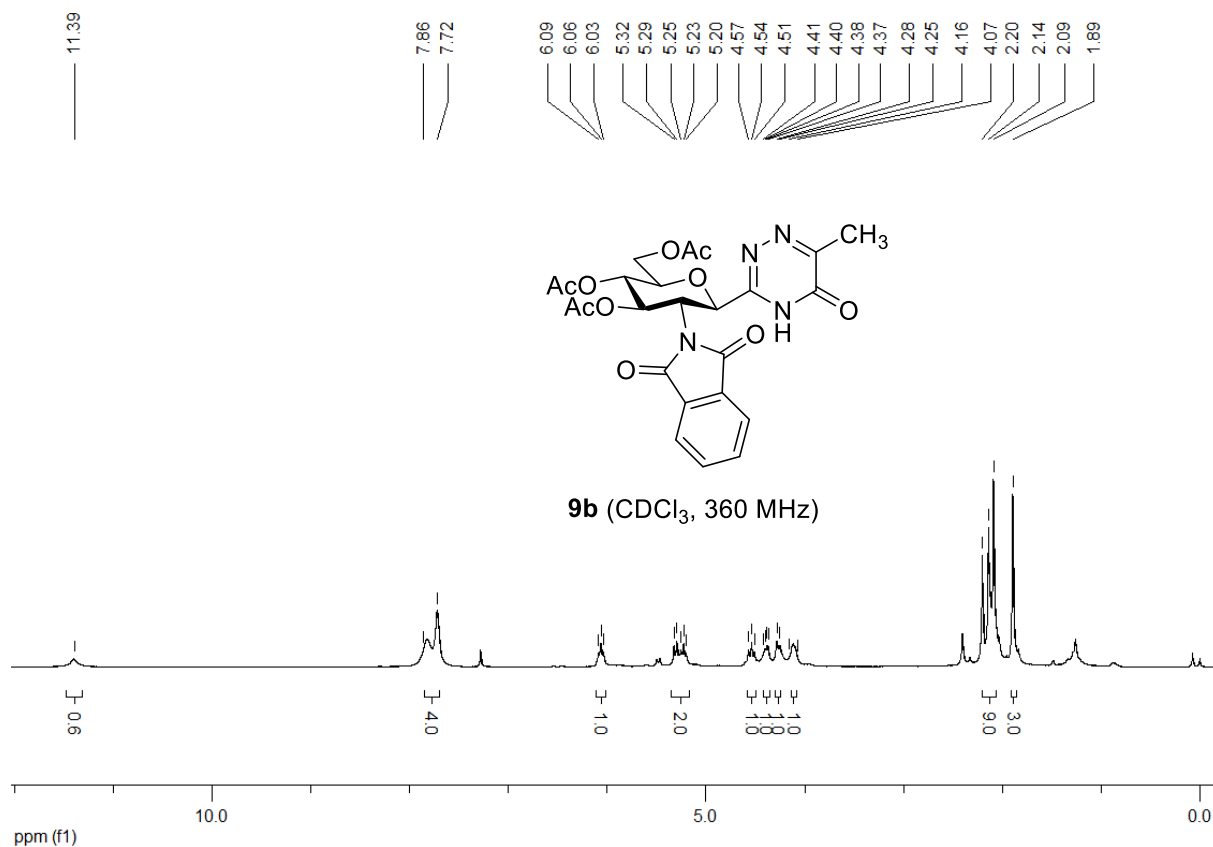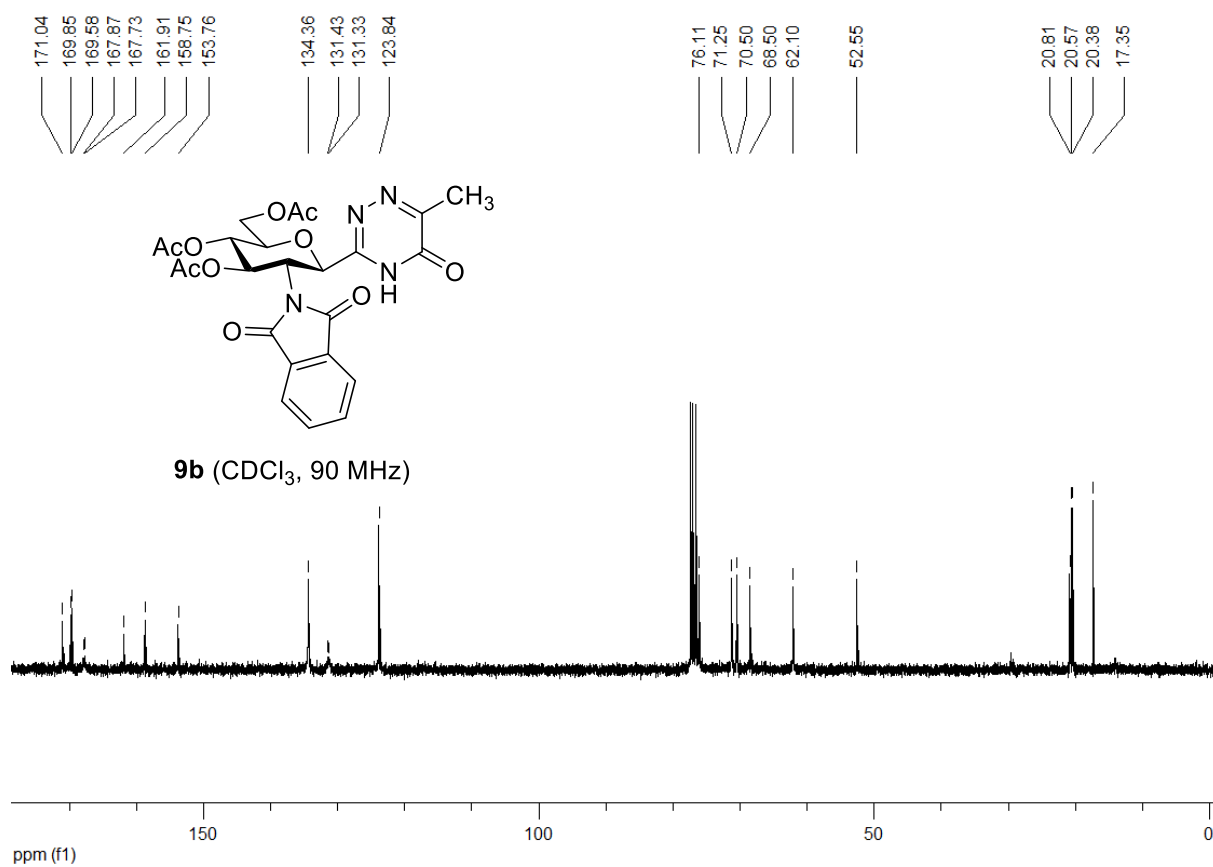

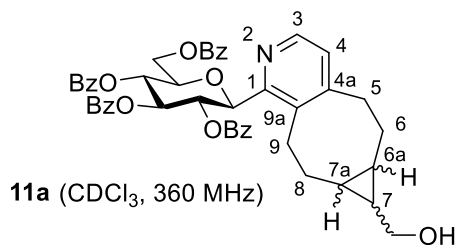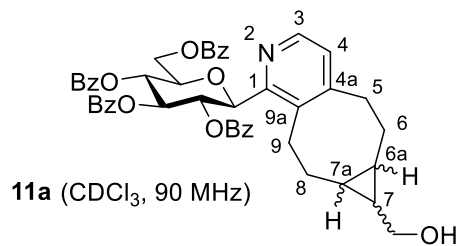

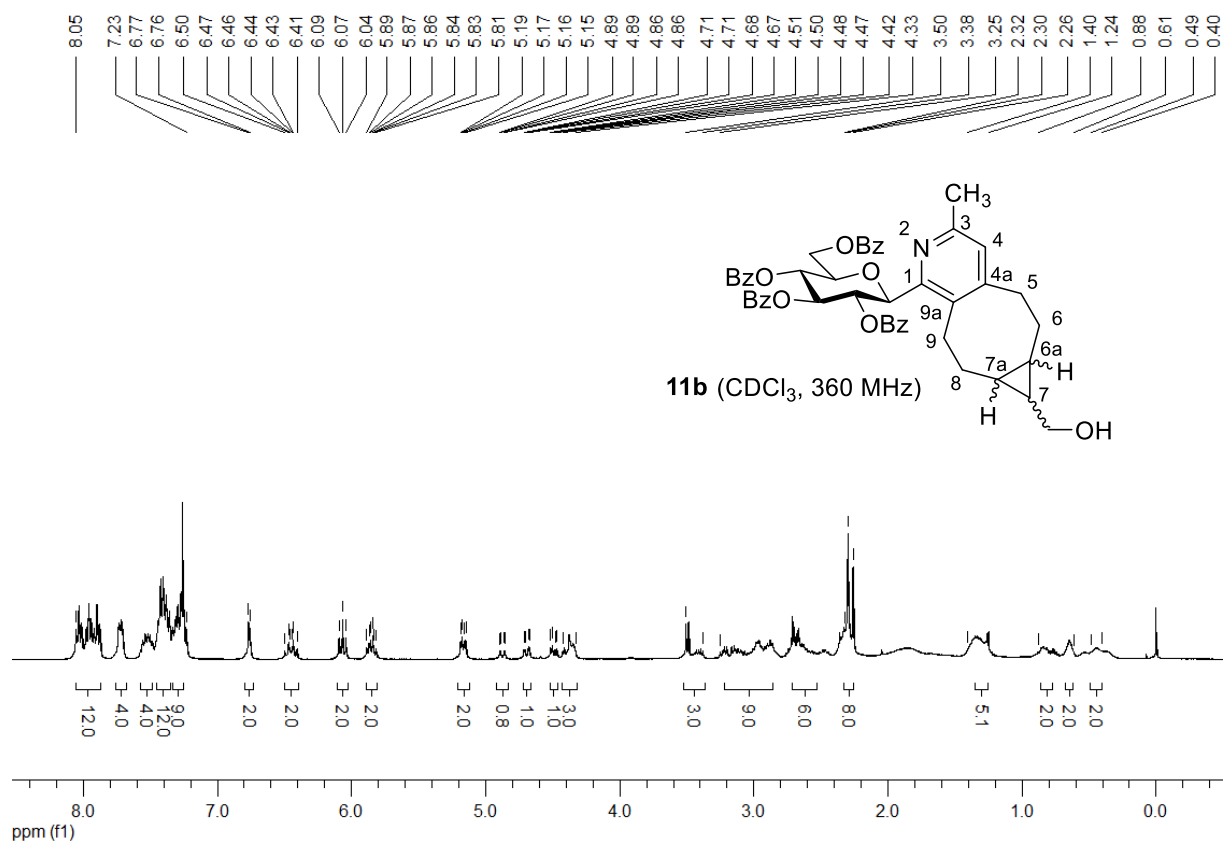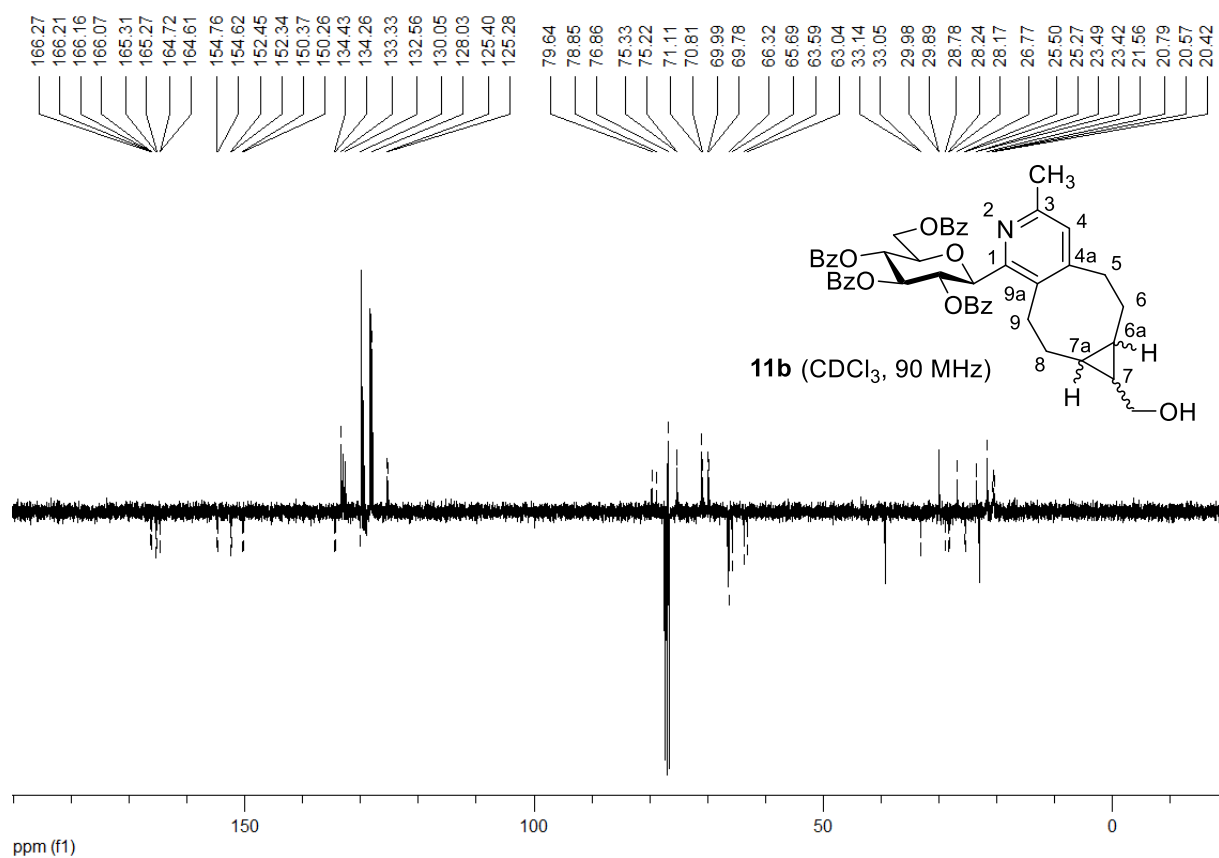

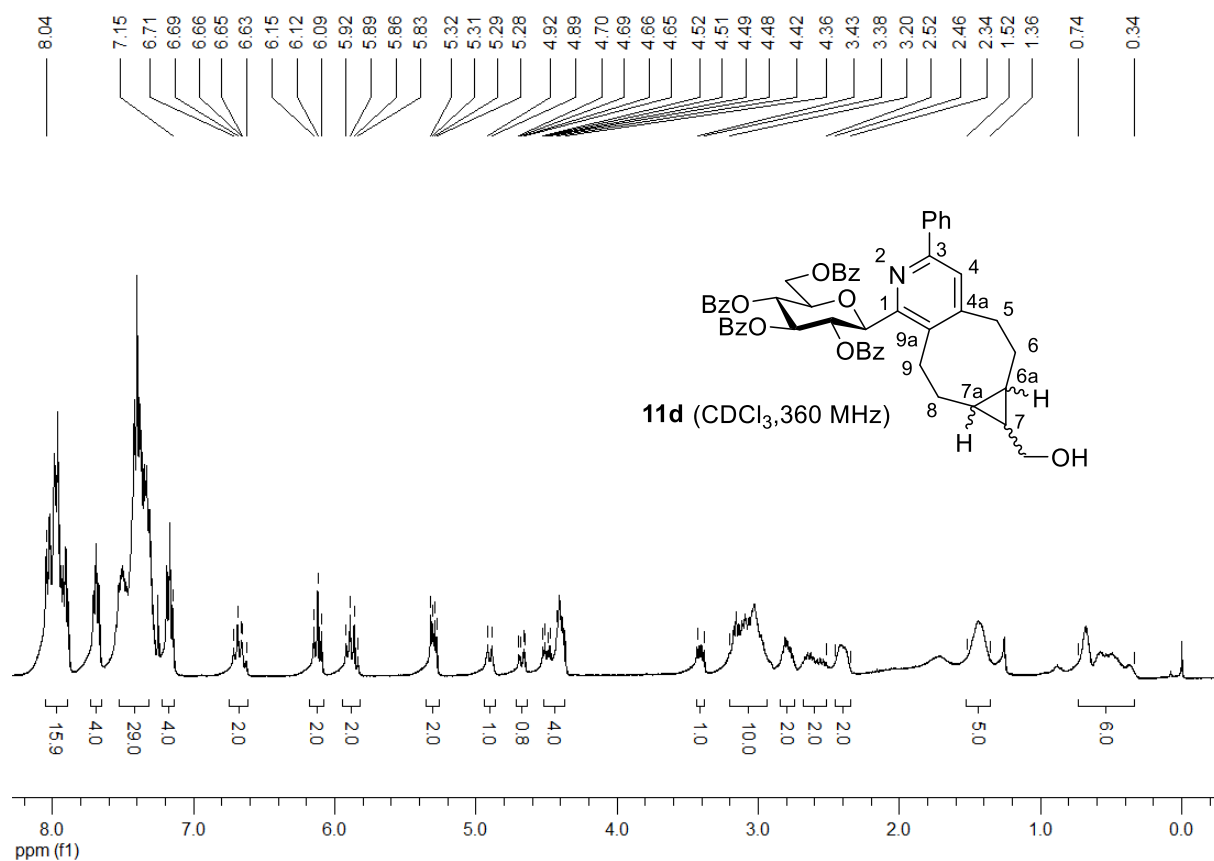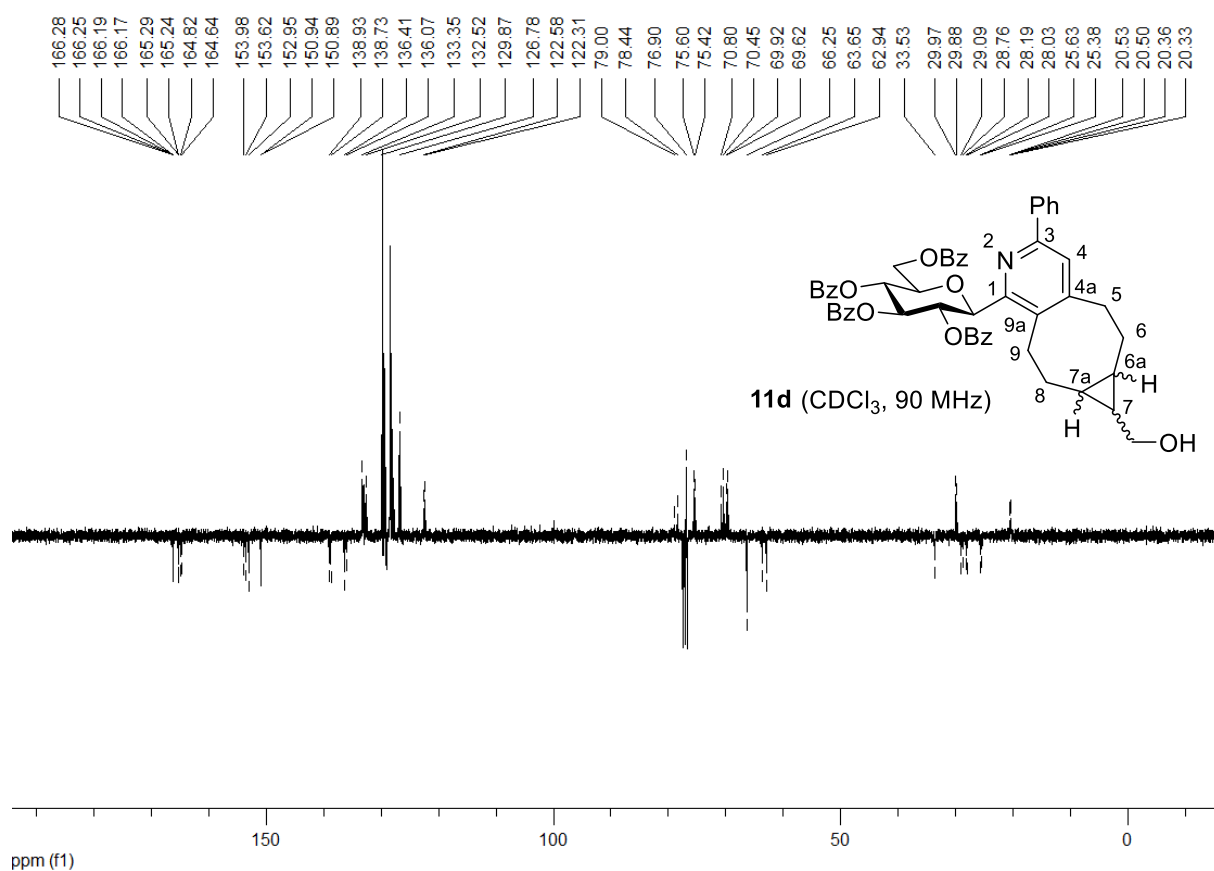

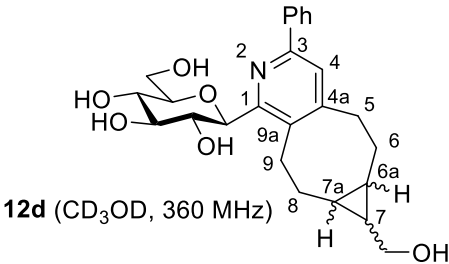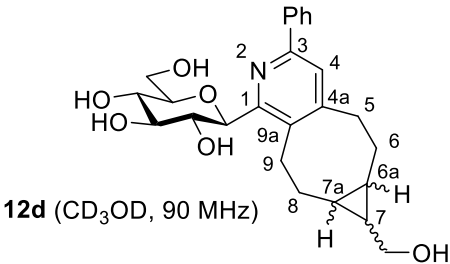

Supplement: s1 [file s1]
